# Supplementary material for: Ultrastructural comparison of dendritic spine morphology preserved with cryo and chemical fixation
Source: eLife. 2020 Dec 4;9:e56384. doi: 10.7554/eLife.56384 (PMC7748412; doi:10.7554/eLife.56384)
Supplement: Figure 1—source data 1. [file elife-56384-fig1-data1.xlsx]

## Sheet: Sheet1
Supp Figure 1-Source data. Data values and statistics underlying SupplementaryFigure 1
Neck diameter (μm)								Neck cross section area (μm2)								Head volume (μm3)								Neck length (μm)
in Cryo-fixation				in Chemical-fixation				in Cryo-fixation				in Chemical-fixation				in Cryo-fixation				in Chemical-fixation				in Cryo-fixation				in Chemical-fixation
	FIBSEM	ssTEM			FIBSEM	ssTEM			FIBSEM	ssTEM			FIBSEM	ssTEM			FIBSEM	ssTEM			FIBSEM	ssTEM			FIBSEM	ssTEM			FIBSEM	ssTEM
1	0.131355	0.147553		1	0.119284	0.126589		1	0.0135446	0.0170909		1	0.0111695	0.0125794		1	0.175921	0.0136123		1	0.00883083	0.0261256		1	1.85848	0.72562		1	0.659874	1.3266
2	0.0960437	0.163728		2	0.173417	0.147824		2	0.00724115	0.0210434		2	0.0236077	0.0171538		2	0.19631	0.0194918		2	0.0176034	0.0359203		2	0.699815	0.82082		2	0.53326	0.637487
3	0.0814076	0.111145		3	0.133499	0.186882		3	0.00520235	0.00969734		3	0.0139902	0.027416		3	0.126816	0.0245864		3	0.0344657	0.00815511		3	0.462788	1.05843		3	1.30078	0.726215
4	0.0994699	0.247691		4	0.208432	0.160463		4	0.007767	0.0481603		4	0.0341035	0.0202124		4	0.0725428	0.0588977		4	0.0270851	0.027253		4	0.0884421	0.506531		4	0.109082	0.203182
5	0.191633	0.182517		5	0.168921	0.155061		5	0.0288278	0.0261503		5	0.0223994	0.0188745		5	0.0217395	0.142623		5	0.045351	0.0304621		5	0.30241	0.722069		5	0.734613	0.937576
6	0.196556	0.199739		6	0.159501	0.180493		6	0.0303278	0.0313182		6	0.019971	0.0255736		6	0.0560595	0.094629		6	0.021988	0.0240064		6	0.100156	1.05415		6	0.942273	0.779088
7	0.10795	0.186073		7	0.18824	0.119461		7	0.00914769	0.0271791		7	0.0278161	0.0112027		7	0.0974436	0.0644591		7	0.0195344	0.3076		7	1.4086	0.176235		7	0.41354	0.60979
8	0.0663122	0.13281		8	0.219281	0.118733		8	0.00345189	0.0138462		8	0.0377462	0.0110665		8	0.0109514	0.0636817		8	0.0992791	0.0173234		8	0.963852	1.12736		8	1.87208	0.537498
9	0.0867176	0.154066		9	0.243842	0.187358		9	0.00590315	0.0186331		9	0.0466754	0.0275558		9	0.0573164	0.0702966		9	0.439986	0.0487877		9	1.6514	0.141796		9	0.54372	1.75721
10	0.0897531	0.162117		10	0.154089	0.146183		10	0.00632366	0.0206313		10	0.0186387	0.0167751		10	0.252225	0.0369596		10	0.0586473	0.057175		10	0.611011	0.307025		10	0.881242	0.752514
11	0.0897897	0.201392		11	0.11638	0.182978		11	0.00632882	0.0318386		11	0.0106323	0.0262826		11	0.0699957	0.0332619		11	0.0663363	0.0459448		11	0.7919	1.14517		11	0.876071	1.2649
12	0.0812842	0.186249		12	0.101986	0.200961		12	0.00518659	0.0272306		12	0.00816483	0.0317025		12	0.111305	0.0588977		12	0.045314	0.144798		12	0.506294	0.235279		12	0.391277	1.34885
13	0.127432	0.278302		13	0.169451	0.210628		13	0.0127476	0.0607999		13	0.0225402	0.0348258		13	0.114792	0.142623		13	0.056158	0.156995		13	2.5862	0.700363		13	0.174965	0.415608
14	0.431786	0.158457		14	0.152045	0.168134		14	0.146355	0.0197103		14	0.0181473	0.0221911		14	0.0484858	0.0204726		14	0.0379673	0.111971		14	0.631776	0.83817		14	1.16931	3.21214
15	0.122376	0.241538		15	0.131707	0.203142		15	0.0117562	0.0457975		15	0.0136172	0.0323942		15	0.131924	0.0636817		15	0.0573402	0.255766		15	0.411847	1.37966		15	0.688398	0.733081
16	0.0596609	0.12707		16	0.212878	0.13664		16	0.00279415	0.0126752		16	0.0355739	0.0146564		16	0.0671006	0.105178		16	0.170983	0.165374		16	0.241402	0.104574		16	0.33981	2.07566
17	0.158218	0.0949455		17	0.221815	0.200293		17	0.0196509	0.0070765		17	0.0386234	0.0314919		17	0.146258	0.0511401		17	0.0347896	0.0201387		17	0.248489	0.151481		17	0.219741	0.17975
18	0.112962	0.106406		18	0.180681	0.134703		18	0.0100168	0.00888796		18	0.0256267	0.0142437		18	0.0449167	0.0584512		18	0.140511	0.0255108		18	0.257998	0.652369		18	0.773694	0.891423
19	0.112061	0.221562		19	0.115796	0.146208		19	0.0098578	0.0385353		19	0.0105258	0.0167808		19	0.0590409	0.0274511		19	0.00128422	0.195272		19	1.6841	0.939245		19	0.627443	0.591613
20	0.0612302	0.183591		20	0.141901	0.16271		20	0.00294307	0.0264589		20	0.0158066	0.0207826		20	0.117945	0.0283942		20	0.0527995	0.016345		20	0.729933	0.616982		20	0.520295	1.32089
21	0.110209	0.148339		21	0.177947	0.14024		21	0.00953455	0.0172736		21	0.024857	0.0154388		21	0.0400001	0.110254		21	0.264134	0.174726		21	0.162898	0.088431		21	0.157127	1.12996
22	0.0787868	0.131769		22	0.226461	0.169108		22	0.00487278	0.0136299		22	0.0402583	0.022449		22	0.00904986	0.0702966		22	0.0418011	0.0272235		22	2.66112	0.0656899		22	0.642415	0.728599
23	0.0749049	0.232715		23	0.155241	0.173048		23	0.00440443	0.0425126		23	0.0189183	0.0235072		23	0.0397368	0.0369596		23	0.0280949	0.073182		23	1.79589	0.939699		23	1.10442	1.16917
24	0.118895	0.200684		24	0.144743	0.199757		24	0.0110967	0.0316151		24	0.0164462	0.0313238		24	0.123719	0.0332619		24	0.0677965	0.0409383		24	1.04219	1.46233		24	1.2149	0.365239
25	0.0640652	0.121515		25	0.125916	0.138529		25	0.00322192	0.0115912		25	0.0124461	0.0150644		25	0.0182742	0.064163		25	0.0305301	0.0331041		25	0.619386	0.998332		25	0.614866	0.738124
26	0.0994389	0.188203		26	0.163257	0.138997		26	0.00776216	0.0278051		26	0.0209225	0.0151664		26	0.00763951	0.0639953		26	0.0107416	0.022171		26	0.140876	0.856616		26	0.0807476	1.68455
27	0.0583525	0.109574		27	0.157394	0.131556		27	0.00267293	0.00942509		27	0.0194468	0.013586		27	0.128892	0.0362266		27	0.0282367	0.0151491		27	0.971958	0.2597		27	1.35042	0.164852
28		0.0993853		28	0.183062	0.188433		28		0.00775379		28	0.0263066	0.0278731		28		0.0247869		28	0.0225692	0.00523358		28		0.549907		28	0.257913	0.212926
29		0.0898255		29	0.240859	0.172103		29		0.00633386		29	0.0455402	0.0232513		29		0.0594574		29	0.175188	0.0218998		29		0.498194		29	0.111818	0.460199
30		0.136357		30	0.237596	0.134513		30		0.0145957		30	0.0443148	0.0142036		30		0.0778237		30	0.0210169	0.0319196		30		0.68532		30	0.174155	0.341757
31		0.184767		31	0.146044	0.272915		31		0.026799		31	0.0167432	0.0584688		31		0.0358023		31	0.048441	0.0230665		31		0.552833		31	0.21418	0.107841
32		0.151257		32	0.198785	0.187073		32		0.0179597		32	0.0310196	0.0274722		32		0.023405		32	0.0299235	0.0586104		32		0.941977		32	1.8005	1.17929
33		0.190905		33	0.27847	0.281907		33		0.0286092		33	0.0608733	0.0623853		33		0.021942		33	0.113188	0.136951		33		0.403596		33	1.07065	0.638408
34		0.187837		34	0.171801	0.238607		34		0.0276971		34	0.0231698	0.0446927		34		0.0144546		34	0.0583852	0.424418		34		0.484787		34	0.640454	0.786486
35		0.101388		35	0.156043	0.120267		35		0.00806948		35	0.0191143	0.0113544		35		0.0351429		35	0.0340238	0.0413405		35		0.381107		35	0.556329	0.976749
36		0.0655809		36	0.12395	0.150853		36		0.00337618		36	0.0120604	0.0178639		36		0.152157		36	0.0265217	0.0224132		36		0.54062		36	1.61034	0.90219
37		0.0729029		37	0.227319	0.103075		37		0.00417215		37	0.0405639	0.00834019		37		0.0138534		37	0.137881	0.0151017		37		1.14684		37	1.08954	0.920135
38		0.0593749		38	0.145302	0.215667		38		0.00276743		38	0.0165733	0.0365121		38		0.0168446		38	0.0291839	0.070347		38		0.768454		38	0.517831	1.13215
39		0.0795055		39	0.0864323	0.12002		39		0.00496209		39	0.00586437	0.0113078		39		0.0234759		39	0.0207099	0.0248618		39		1.84936		39	1.10934	0.825217
40		0.104223		40	0.139341	0.148377		40		0.00852701		40	0.0152415	0.0172824		40		0.182505		40	0.0257978	0.0480694		40		0.43557		40	1.7359	0.805952
41		0.295816		41	0.0834274	0.213661		41		0.0686931		41	0.0054637	0.035836		41		0.0582667		41	0.00487089	0.0892978		41		0.246236		41	0.0870512	0.435181
42		0.0597893		42	0.147259	0.181684		42		0.00280618		42	0.0170229	0.0259123		42		0.133554		42	0.0674369	0.107681		42		0.277502		42	0.423757	0.294279
43		0.105472		43	0.147222	0.198704		43		0.00873253		43	0.0170143	0.0309943		43		0.0849465		43	0.0386617	0.0995851		43		0.644673		43	0.198774	0.454476
44		0.123119		44	0.11988	0.17917		44		0.0118992		44	0.0112814	0.0252		44		0.0993836		44	0.0317443	0.129548		44		0.646099		44	1.27264	0.790719
45		0.0529432		45	0.175612	0.239301		45		0.00220034		45	0.0242092	0.0449529		45		0.0208327		45	0.0196316	0.106431		45		0.516091		45	2.54073	0.350455
46		0.0768074		46	0.317584	0.201561		46		0.00463101		46	0.0791748	0.031892		46		0.0415804		46	0.0637228	0.0450696		46		0.419139		46	0.344661	0.829581
47		0.111501		47	0.131479	0.193734		47		0.00975948		47	0.0135701	0.0294634		47		0.0110459		47	0.0338421	0.032966		47		0.524258		47	0.300843	0.644425
48		0.0543438		48	0.266281	0.179613		48		0.0023183		48	0.0556609	0.0253249		48		0.0314977		48	0.0535354	0.198818		48		0.365344		48	0.567867	1.00992
49		0.132105		49	0.133217	0.144138		49		0.0136997		49	0.0139311	0.0163089		49		0.104051		49	0.0207457	0.0150713		49		0.461094		49	0.645014	1.90918
50		0.0803673		50	0.19238	0.137445		50		0.00507024		50	0.0290528	0.0148294		50		0.0235244		50	0.191399	0.0341649		50		0.603994		50	0.808049	1.77744
51		0.0606357		51	0.135668	0.203843		51		0.0028862		51	0.0144485	0.0326182		51		0.0312433		51	0.116995	0.0672396		51		0.527961		51	1.1912	0.890573
52		0.0704465		52	0.110882	0.206884		52		0.00389573		52	0.00965146	0.0335986		52		0.0692739		52	0.178904	0.0584138		52		0.960221		52	0.352912	1.69483
53		0.0931484		53	0.176334	0.177061		53		0.00681115		53	0.0244087	0.0246103		53		0.0492991		53	0.205717	0.0692156		53		0.717332		53	1.03	0.73626
54		0.0697313		54	0.157378	0.201773		54		0.00381702		54	0.0194427	0.0319592		54		0.0687741		54	0.0633645	0.0837411		54		0.737652		54	0.604356	0.661293
55		0.0521663		55	0.208076	0.188773		55		0.00213624		55	0.0339869	0.0279736		55		0.019541		55	0.279952	0.226074		55		0.169193		55	0.826959	1.14013
56		0.0681464		56	0.1842	0.29038		56		0.00364549		56	0.0266347	0.0661917		56		0.0254593		56	0.0976611	0.0697104		56		0.781609		56	0.904934	0.240992
57		0.0724158		57	0.193156	0.186529		57		0.00411658		57	0.0292877	0.0273127		57		0.117864		57	0.0317515	0.0100617		57		1.78239		57	0.187361	0.664339
58		0.0994238		58	0.44492	0.245639		58		0.0077598		58	0.155394	0.0473657		58		0.0869223		58	0.029497	0.0733469		58		1.38713		58	0.397124	0.512436
59		0.145411		59	0.14886	0.250668		59		0.0165984		59	0.017395	0.0493252		59		0.050643		59	0.174711	0.194012		59		1.70154		59	0.550149	1.24776
60		0.0753377		60	0.19527	0.389475		60		0.00445548		60	0.0299322	0.119077		60		0.0149609		60	0.443171	0.0414076		60		0.893029		60	0.202697	0.153504
61		0.112007		61	0.152727	0.140559		61		0.00984828		61	0.0183106	0.0155092		61		0.365758		61	0.0980236	0.0397012		61		0.53113		61	0.717941	0.425501
62		0.130884		62	0.180667	0.169959		62		0.0134475		62	0.025623	0.0226756		62		0.0918554		62	0.0759167	0.0522611		62		2.0262		62	0.730923	1.40737
63		0.0693975		63	0.240355	0.186987		63		0.00378057		63	0.0453498	0.0274467		63		0.0321074		63	0.0287845	0.0558846		63		1.15844		63	0.573335	0.20206
64		0.075147		64	0.209345	0.163242		64		0.00443295		64	0.0344029	0.0209187		64		0.0108776		64	0.0617573	0.0346419		64		0.263411		64	0.93223	1.49637
65		0.0687656		65	0.19909	0.158132		65		0.00371203		65	0.0311148	0.0196294		65		0.0459639		65	0.0549527	0.0203485		65		1.038		65	0.715519	2.17573
66		0.0869073		66	0.309972	0.15639		66		0.00592902		66	0.075425	0.0191995		66		0.0976477		66	0.0429623	0.029124		66		0.663802		66	0.270574	2.21308
67		0.104157		67	0.318045	0.191947		67		0.00851625		67	0.079405	0.0289224		67		0.00655567		67	0.316928	0.0556868		67		0.0295122		67	2.34798	1.31145
68		0.309157		68	0.338677	0.133981		68		0.075029		68	0.090041	0.0140915		68		0.0414385		68	0.320389	0.0663918		68		0.154484		68	0.338452	0.58513
69		0.22039		69	0.224344	0.16451		69		0.0381287		69	0.0395094	0.0212448		69		0.00994773		69	0.0613539	0.0809128		69		0.26446		69	0.602626	1.66496
70		0.0861529		70	0.256763	0.217289		70		0.00582652		70	0.0517531	0.0370634		70		0.0511529		70	0.320389	0.0146536		70		0.965862		70	0.183598	0.383165
71		0.18266		71	0.191388	0.211126		71		0.0261912		71	0.0287542	0.0349906		71		0.0251097		71	0.0577406	0.0590414		71		0.205304		71	0.943715	1.68458
72		0.118176		72	0.162468	0.139254		72		0.010963		72	0.0207208	0.0152225		72		0.0444393		72	0.0712358	0.0361303		72		0.192727		72	0.171042	0.257622
73		0.185022		73	0.18103	0.200461		73		0.0268729		73	0.0257259	0.031545		73		0.270324		73	0.0530588	0.0296312		73		1.32878		73	1.73807	0.702434
74		0.257916		74	0.260073	0.180549		74		0.0522186		74	0.0530957	0.0255894		74		0.177322		74	0.13137	0.0206784		74		0.554854		74	1.86469	1.55189
75		0.0878724		75	0.191407	0.154894		75		0.00606142		75	0.0287598	0.0188338		75		0.0106028		75	0.194727	0.0371924		75		0.645412		75	0.7061	1.17973
76		0.0490477		Summary				76		0.00188846		Summary				76		0.00410056		Summary				76		0.37339		Summary
77		0.068866		Mean	0.1851	0.1797		77		0.00372288		Mean	0.02989	0.027		77		0.00585444		Mean	0.08916	0.07221		77		0.314617		Mean	0.748	0.9233
78		0.118001		SD	0.062	0.046		78		0.0109305		SD	0.0229	0.01593		78		0.0100742		SD	0.09712	0.07488		78		1.45927		SD	0.5382	0.5895
79		0.0913619		Median	0.1756	0.1792		79		0.00655239		Median	0.02421	0.0252		79		0.0290519		Median	0.05354	0.04507		79		0.212258		Median	0.6405	0.786
80		0.148438		IQR	0.1453, 0.2129	0.1462, 0.201		80		0.0172965		IQR	0.01657, 0.03557	0.01678, 0.03170		80		0.309782		IQR	0.02918, 0.1132	0.02551, 0.08374		80		0.673698		IQR	0.3400, 1.0300	0.4602, 1.265
81		0.106158		n=	75	75		81		0.00884656		n=	75	75		81		0.0487883		n=	75	75		81		0.694667		n=	75	75
82		0.118639		Statistic test	t test, unpaired, Kolmogorov-Smirnov test, p=0.5176			82		0.011049		Statistic test	t test, unpaired, Kolmogorov-Smirnov test, p=0.5176			82		0.0818877		Statistic test	t test, unpaired, Kolmogorov-Smirnov test, p=0.8996			82		1.41172		Statistic test	t test, unpaired, Kolmogorov-Smirnov test, p=0.0996
83		0.0907893						83		0.00647051						83		0.0504233						83		0.364625
84		0.156148						84		0.01914						84		0.0844786						84		1.42429
85		0.134519						85		0.0142049						85		0.0734435						85		1.369
86		0.121143						86		0.0115204						86		0.073879						86		1.53611
87		0.131694						87		0.0136145						87		0.0994187						87		1.46554
88		0.149412						88		0.0175244						88		0.0771498						88		1.98
89		0.120041						89		0.0113117						89		0.121946						89		0.486345
Summary								Summary								Summary								Summary
Mean	0.1151	0.1319						Mean	0.0144	0.0164						Mean	0.0869	0.06483						Mean	0.8752	0.7355
SD	0.0727	0.0593						SD	0.02729	0.0151						SD	0.06144	0.062						SD	0.7354	0.478
Median	0.0994	0.12						Median	0.00762	0.01131						Median	0.07	0.05042						Median	0.6318	0.6461
IQR	0.07879, 0.1224	0.0865, 0.1731						IQR	0.004872, 0.01176	0.005878,0.02360						IQR	0.04000, 0.1268	0.02469, 0.08318						IQR	0.2580, 1.409	0.3694, 1.0182
n=	27	89						n=	27	89						n=	27	89						n=	27	89
Statistic test	t test, unpaired, Kolmogorov-Smirnov test, p=0.0613							Statistic test	t test, unpaired, Kolmogorov-Smirnov test, p=0.0613							Statistic test	t test, unpaired, Kolmogorov-Smirnov test, p=0.0711							Statistic test	t test, unpaired, Kolmogorov-Smirnov test, p=0.6175
