# Supplementary material for: Ultrastructural comparison of dendritic spine morphology preserved with cryo and chemical fixation
Source: eLife. 2020 Dec 4;9:e56384. doi: 10.7554/eLife.56384 (PMC7748412; doi:10.7554/eLife.56384)
Supplement: Figure 2—source data 1. [file elife-56384-fig2-data1.xlsx]

## Sheet: Sheet1
Figure 2-Source data. Data values and statistics underlying Figure 2
Neck cross section area (μm2)				Minimum Neck cross section area (μm2)				Neck diamter (μm)				Minimum diameter (μm)				Neck length (μm)				Head volume (μm3)
Spine No.	cryo-fixed	chemical-fixed		Spine No.	cryo-fixed	chemical-fixed		Spine No.	cryo-fixed	chemical-fixed		Spine No.	cryo-fixed	chemical-fixed		Spine No.	cryo-fixed	chemical-fixed		Spine No.	cryo-fixed	chemical-fixed
1	0.0135446	0.0111695		1	0.00168753	0.00819558		1	0.131355	0.119284		1	0.0481639	0.0920611		1	1.85848	0.659874		1	0.175921	0.00883083
2	0.00724115	0.0236077		2	0.00124592	0.0150363		2	0.0960437	0.173417		2	0.0375453	0.120633		2	0.699815	0.53326		2	0.19631	0.0176034
3	0.00520235	0.0139902		3	0.00164343	0.00485611		3	0.0814076	0.133499		3	0.0453139	0.0841589		3	0.462788	1.30078		3	0.126816	0.0344657
4	0.007767	0.0341035		4	0.00348805	0.0319106		4	0.0994699	0.208432		4	0.051757	0.176987		4	0.0884421	0.109082		4	0.0725428	0.0270851
5	0.0288278	0.0223994		5	0.00319121	0.0179909		5	0.191633	0.168921		5	0.0644052	0.137937		5	0.30241	0.734613		5	0.0217395	0.045351
6	0.0303278	0.019971		6	0.00391533	0.0113601		6	0.196556	0.159501		6	0.061954	0.102719		6	0.100156	0.942273		6	0.0560595	0.021988
7	0.00914769	0.0278161		7	0.00357775	0.0164927		7	0.10795	0.18824		7	0.0731565	0.124122		7	1.4086	0.41354		7	0.0974436	0.0195344
8	0.00345189	0.0377462		8	0.00133849	0.0178516		8	0.0663122	0.219281		8	0.0445881	0.134743		8	0.963852	1.87208		8	0.0109514	0.0992791
9	0.00590315	0.0466754		9	0.00612309	0.0372628		9	0.0867176	0.243842		9	0.0855344	0.196241		9	1.6514	0.54372		9	0.0573164	0.439986
10	0.00632366	0.0186387		10	0.026658	0.0103488		10	0.0897531	0.154089		10	0.149201	0.0931777		10	0.611011	0.881242		10	0.252225	0.0586473
11	0.00632882	0.0106323		11	0.0259065	0.00669466		11	0.0897897	0.11638		11	0.167411	0.0862487		11	0.7919	0.876071		11	0.0699957	0.0663363
12	0.00518659	0.00816483		12	0.00255388	0.00486005		12	0.0812842	0.101986		12	0.0489641	0.0821415		12	0.506294	0.391277		12	0.111305	0.045314
13	0.0127476	0.0225402		13	0.00250997	0.0039447		13	0.127432	0.169451		13	0.0502199	0.10776		13	2.5862	0.174965		13	0.114792	0.056158
14	0.146355	0.0181473		14	0.129883	0.00860833		14	0.431786	0.152045		14	0.406634	0.0733496		14	0.631776	1.16931		14	0.0484858	0.0379673
15	0.0117562	0.0136172		15	0.00748126	0.00751127		15	0.122376	0.131707		15	0.0697383	0.0918975		15	0.411847	0.688398		15	0.131924	0.0573402
16	0.00279415	0.0355739		16	0.00168146	0.0243053		16	0.059661	0.212878		16	0.0389729	0.137533		16	0.241402	0.33981		16	0.0671006	0.170983
17	0.0196509	0.0386234		17	0.0120718	0.0309738		17	0.158218	0.221815		17	0.105292	0.156937		17	0.248489	0.219741		17	0.146258	0.0347896
18	0.0100168	0.0256267		18	0.00674654	0.0198723		18	0.112962	0.180681		18	0.0868405	0.128568		18	0.257998	0.773694		18	0.0449167	0.140511
19	0.0098578	0.0105258		19	0.00252415	0.00642744		19	0.112061	0.115796		19	0.0601507	0.0816996		19	1.6841	0.627443		19	0.0590409	0.00128422
20	0.00294307	0.0158066		20	0.00084882	0.0111609		20	0.0612302	0.141901		20	0.0347886	0.110815		20	0.729933	0.520295		20	0.117945	0.0527995
21	0.00953455	0.024857		21	0.00467807	0.0179044		21	0.110209	0.177947		21	0.0573127	0.126559		21	0.162898	0.157127		21	0.0400001	0.264134
22	0.00487278	0.0402583		22	0.00118561	0.0245289		22	0.0787868	0.226461		22	0.041546	0.147338		22	2.66112	0.642415		22	0.00904986	0.0418011
23	0.00440443	0.0189183		23	0.00147547	0.0063138		23	0.0749049	0.155241		23	0.039156	0.0879123		23	1.79589	1.10442		23	0.0397368	0.0280949
24	0.0110967	0.0164462		24	0.00258387	0.0107488		24	0.118895	0.144743		24	0.0616417	0.103389		24	1.04219	1.2149		24	0.123719	0.0677965
25	0.00322192	0.0124461		25	0.00080554	0.00630893		25	0.0640652	0.125916		25	0.0276694	0.0628098		25	0.619386	0.614866		25	0.0182742	0.0305301
26	0.00776216	0.0209225		26	0.00563194	0.0189598		26	0.0994389	0.163257		26	0.0763763	0.115885		26	0.140876	0.0807476		26	0.00763951	0.0107416
27	0.00267293	0.0194468		27	0.0126865	0.00996517		27	0.0583525	0.157394		27	0.127086	0.107852		27	0.971958	1.35042		27	0.128892	0.0282367
28	0.0170909	0.0263066		28	0.00925046	0.0114417		28	0.147553	0.183062		28	0.0690807	0.105434		28	0.72562	0.257913		28	0.0136123	0.0225692
29	0.0210434	0.0455402		29	0.00208188	0.0353168		29	0.163728	0.240859		29	0.0501012	0.156319		29	0.82082	0.111818		29	0.0194918	0.175188
30	0.00969734	0.0443148		30	0.0153162	0.0346967		30	0.111145	0.237596		30	0.107241	0.18678		30	1.05843	0.174155		30	0.0245864	0.0210169
31	0.0481603	0.0167432		31	0.0370367	0.0125495		31	0.247691	0.146044		31	0.17949	0.105899		31	0.506531	0.21418		31	0.0588977	0.048441
32	0.0261503	0.0310196		32	0.0204981	0.0113825		32	0.182517	0.198785		32	0.136443	0.11409		32	0.722069	1.8005		32	0.142623	0.0299235
33	0.0313182	0.0608733		33	0.00976696	0.0258668		33	0.199739	0.27847		33	0.105826	0.152367		33	1.05415	1.07065		33	0.094629	0.113188
34	0.0271791	0.0231698		34	0.0217974	0.0161665		34	0.186073	0.171801		34	0.124611	0.118755		34	0.176235	0.640454		34	0.0644591	0.0583852
35	0.0138462	0.0191143		35	0.0043313	0.0149052		35	0.13281	0.156043		35	0.0807305	0.0937793		35	1.12736	0.556329		35	0.0636817	0.0340238
36	0.0186331	0.0120604		36	0.0156447	0.0066196		36	0.154066	0.12395		36	0.120244	0.0818175		36	0.141796	1.61034		36	0.0702966	0.0265217
37	0.0206313	0.0405639		37	0.0134197	0.0228393		37	0.162117	0.227319		37	0.109645	0.146554		37	0.307025	1.08954		37	0.0369596	0.137881
38	0.0318386	0.0165733		38	0.0126984	0.0108013		38	0.201392	0.145302		38	0.111896	0.107808		38	1.14517	0.517831		38	0.0332619	0.0291839
39	0.0272306	0.00586437		39	0.0194945	0.00291717		39	0.186249	0.0864323		39	0.108162	0.0687081		39	0.235279	1.10934		39	0.0588977	0.0207099
40	0.0607999	0.0152415		40	0.0387468	0.00197011		40	0.278302	0.139341		40	0.165144	0.0596425		40	0.700363	1.7359		40	0.142623	0.0257978
41	0.0197103	0.0054637		41	0.0043554	0.00510827		41	0.158457	0.0834274		41	0.0667724	0.0753581		41	0.83817	0.0870512		41	0.0204726	0.00487089
42	0.0457975	0.0170229		42	0.0227851	0.0114293		42	0.241538	0.147259		42	0.142994	0.102978		42	1.37966	0.423757		42	0.0636817	0.0674369
43	0.0126752	0.0170143		43	0.0109062	0.0132464		43	0.12707	0.147222		43	0.0882329	0.102659		43	0.104574	0.198774		43	0.105178	0.0386617
44	0.0070765	0.0112814		44	0.00638949	0.00254983		44	0.0949455	0.11988		44	0.0513209	0.0635664		44	0.151481	1.27264		44	0.0511401	0.0317443
45	0.00888796	0.0242092		45	0.00451277	0.00817877		45	0.106406	0.175612		45	0.0796781	0.0949314		45	0.652369	2.54073		45	0.0584512	0.0196316
46	0.0385353	0.0791748		46	0.0213462	0.0751443		46	0.221562	0.317584		46	0.141896	0.241099		46	0.939245	0.344661		46	0.0274511	0.0637228
47	0.0264589	0.0135701		47	0.0206354	0.00990883		47	0.183591	0.131479		47	0.145621	0.0923414		47	0.616982	0.300843		47	0.0283942	0.0338421
48	0.0172736	0.0556609		48	0.014956	0.0334281		48	0.148339	0.266281		48	0.131813	0.153719		48	0.088431	0.567867		48	0.110254	0.0535354
49	0.0136299	0.0139311		49	0.0096407	0.00694946		49	0.131769	0.133217		49	0.0853771	0.078695		49	0.0656899	0.645014		49	0.0702966	0.0207457
50	0.0425126	0.0290528		50	0.0247505	0.0144034		50	0.232715	0.19238		50	0.123113	0.12072		50	0.939699	0.808049		50	0.0369596	0.191399
51	0.0316151	0.0144485		51	0.00534306	0.00855409		51	0.200684	0.135668		51	0.0743391	0.0901384		51	1.46233	1.1912		51	0.0332619	0.116995
52	0.0115912	0.00965146		52	0.00470051	0.00815246		52	0.121515	0.110882		52	0.0822037	0.0894733		52	0.998332	0.352912		52	0.064163	0.178904
53	0.0278051	0.0244087		53	0.00992072	0.0152955		53	0.188203	0.176334		53	0.090004	0.124454		53	0.856616	1.03		53	0.0639953	0.205717
54	0.00942509	0.0194427		54	0.00769272	0.0168824		54	0.109574	0.157378		54	0.0670479	0.0999258		54	0.2597	0.604356		54	0.0362266	0.0633645
55	0.00775379	0.0339869		55	0.00339895	0.00294411		55	0.0993853	0.208076		55	0.052651	0.158472		55	0.549907	0.826959		55	0.0247869	0.279952
56	0.00633386	0.0266347		56	0.00365319	0.0147634		56	0.0898255	0.1842		56	0.0508654	0.12656		56	0.498194	0.904934		56	0.0594574	0.0976611
57	0.0145957	0.0292877		57	0.00600311	0.0139757		57	0.136357	0.193156		57	0.0934263	0.130185		57	0.68532	0.187361		57	0.0778237	0.0317515
58	0.026799	0.155394		58	0.0154988	0.00916756		58	0.184767	0.44492		58	0.107853	0.0904177		58	0.552833	0.397124		58	0.0358023	0.029497
59	0.0179597	0.017395		59	0.00253583	0.025337		59	0.151257	0.14886		59	0.0616015	0.109536		59	0.941977	0.550149		59	0.023405	0.174711
60	0.0286092	0.0299322		60	0.0196813	0.0160943		60	0.190905	0.19527		60	0.106393	0.0924525		60	0.403596	0.202697		60	0.021942	0.443171
61	0.0276971	0.0183106		61	0.0158511	0.0191443		61	0.187837	0.152727		61	0.0851428	0.119982		61	0.484787	0.717941		61	0.0144546	0.0980236
62	0.00806948	0.025623		62	0.00533027	0.0268781		62	0.101388	0.180667		62	0.0768204	0.131887		62	0.381107	0.730923		62	0.0351429	0.0759167
63	0.00337618	0.0453498		63	0.00265979	0.0232984		63	0.065581	0.240355		63	0.0623938	0.153232		63	0.54062	0.573335		63	0.152157	0.0287845
64	0.00417214	0.0344029		64	0.00207353	0.0317279		64	0.0729029	0.209345		64	0.0344079	0.17344		64	1.14684	0.93223		64	0.0138534	0.0617573
65	0.00276743	0.0311148		65	0.00178906	0.0208584		65	0.0593749	0.19909		65	0.0253175	0.121422		65	0.768454	0.715519		65	0.0168446	0.0549527
66	0.00496209	0.075425		66	0.00105207	0.0141258		66	0.0795056	0.309972		66	0.0235689	0.115921		66	1.84936	0.270574		66	0.0234759	0.0429623
67	0.00852701	0.079405		67	0.00212534	0.0223355		67	0.104223	0.318045		67	0.0449086	0.132775		67	0.43557	2.34798		67	0.182505	0.316928
68	0.0686931	0.090041		68	0.0687497	0.012838		68	0.295816	0.338677		68	0.295844	0.101447		68	0.246236	0.338452		68	0.0582667	0.320389
69	0.00280618	0.0395094		69	0.00181208	0.0218549		69	0.0597892	0.224344		69	0.0341708	0.15277		69	0.277502	0.602626		69	0.133554	0.0613539
70	0.00873253	0.0517531		70	0.00332337	0.0695459		70	0.105472	0.256763		70	0.0548849	0.241207		70	0.644673	0.183598		70	0.0849465	0.320389
71	0.0118992	0.0287542		71	0.0017533	0.0739401		71	0.123119	0.191388		71	0.0279949	0.206837		71	0.646099	0.943715		71	0.0993836	0.0577406
72	0.00220034	0.0207208		72	0.00148836	0.0444482		72	0.0529432	0.162468		72	0.0275015	0.168075		72	0.516091	0.171042		72	0.0208327	0.0712358
73	0.00463101	0.0257259		73	0.00263868	0.0214062		73	0.0768074	0.18103		73	0.0363107	0.0916546		73	0.419139	1.73807		73	0.0415804	0.0530588
74	0.00975948	0.0530957		74	0.00484917	0.0175246		74	0.111501	0.260073		74	0.0785707	0.135933		74	0.524258	1.86469		74	0.0110459	0.13137
75	0.0023183	0.0287598		75	0.00130571	0.0118169		75	0.0543438	0.191407		75	0.0260814	0.0809597		75	0.365344	0.7061		75	0.0314977	0.194727
76	0.0136997	0.0125794		76	0.0032301	0.00329274		76	0.132105	0.126589		76	0.0483024	0.0530051		76	0.461094	1.3266		76	0.104051	0.0261256
77	0.00507024	0.0171538		77	0.00153912	0.0207333		77	0.0803673	0.147824		77	0.0491771	0.104208		77	0.603994	0.637487		77	0.0235244	0.0359203
78	0.0028862	0.027416		78	0.00171769	0.00580601		78	0.0606357	0.186882		78	0.0443678	0.0854729		78	0.527961	0.726215		78	0.0312433	0.00815511
79	0.00389573	0.0202124		79	0.00154831	0.0105729		79	0.0704465	0.160463		79	0.0443972	0.0640966		79	0.960221	0.203182		79	0.0692739	0.027253
80	0.00681115	0.0188745		80	0.00290957	0.0135303		80	0.0931484	0.155061		80	0.0514672	0.118831		80	0.717332	0.937576		80	0.0492991	0.0304621
81	0.00381702	0.0255736		81	0.00155563	0.0232115		81	0.0697313	0.180493		81	0.0309139	0.126153		81	0.737652	0.779088		81	0.0687741	0.0240064
82	0.00213624	0.0112027		82	0.00055496	0.0115632		82	0.0521663	0.119461		82	0.0176317	0.104453		82	0.169193	0.60979		82	0.019541	0.3076
83	0.00364549	0.0110665		83	0.00232269	0.00657881		83	0.0681464	0.118733		83	0.0458494	0.0598261		83	0.781609	0.537498		83	0.0254593	0.0173234
84	0.00411658	0.0275558		84	0.00117204	0.0061213		84	0.0724158	0.187358		84	0.0386277	0.0713765		84	1.78239	1.75721		84	0.117864	0.0487877
85	0.0077598	0.0167751		85	0.00110723	0.0232751		85	0.0994238	0.146183		85	0.0375445	0.115697		85	1.38713	0.752514		85	0.0869223	0.057175
86	0.0165984	0.0262826		86	0.00168056	0.0146431		86	0.145411	0.182978		86	0.036457	0.0847749		86	1.70154	1.2649		86	0.050643	0.0459448
87	0.00445548	0.0317025		87	0.00166968	0.00583529		87	0.0753377	0.200961		87	0.0285036	0.0613468		87	0.893029	1.34885		87	0.0149609	0.144798
88	0.00984828	0.0348258		88	0.00671722	0.0191379		88	0.112007	0.210628		88	0.0782725	0.109746		88	0.53113	0.415608		88	0.365758	0.156995
89	0.0134475	0.0221911		89	0.00179123	0.00595772		89	0.130884	0.168134		89	0.0376797	0.0573213		89	2.0262	3.21214		89	0.0918554	0.111971
90	0.00378057	0.0323942		90	0.0001699	0.00503996		90	0.0693975	0.203142		90	0.0295235	0.0590735		90	1.15844	0.733081		90	0.0321074	0.255766
91	0.00443295	0.0146564		91	0.00180142	0.00960537		91	0.075147	0.13664		91	0.042504	0.085092		91	0.263411	2.07566		91	0.0108776	0.165374
92	0.00371203	0.0314919		92	0.00203052	0.00767657		92	0.0687656	0.200292		92	0.0508429	0.0736328		92	1.038	0.17975		92	0.0459639	0.0201387
93	0.00592902	0.0142437		93	0.00295987	0.0142068		93	0.0869073	0.134703		93	0.0418272	0.105857		93	0.663802	0.891423		93	0.0976477	0.0255108
94	0.00851625	0.0167808		94	0.00812308	0.00893192		94	0.104157	0.146208		94	0.0693236	0.0847046		94	0.0295122	0.591613		94	0.00655567	0.195272
95	0.075029	0.0207826		95	0.0707398	0.0266518		95	0.309157	0.16271		95	0.300095	0.137197		95	0.154484	1.32089		95	0.0414385	0.016345
96	0.0381287	0.0154388		96	0.0191418	0.00746953		96	0.22039	0.14024		96	0.141587	0.0848605		96	0.26446	1.12996		96	0.00994773	0.174726
97	0.00582652	0.022449		97	0.00150745	0.0170294		97	0.0861529	0.169108		97	0.0438075	0.103291		97	0.965862	0.728599		97	0.0511529	0.0272235
98	0.0261912	0.0235072		98	0.0143234	0.00337369		98	0.18266	0.173048		98	0.105555	0.0994045		98	0.205304	1.16917		98	0.0251097	0.073182
99	0.010963	0.0313238		99	0.00290131	0.0292132		99	0.118176	0.199757		99	0.0364735	0.122446		99	0.192727	0.365239		99	0.0444393	0.0409383
100	0.0268729	0.0150644		100	0.0129095	0.00732342		100	0.185022	0.138529		100	0.087944	0.059854		100	1.32878	0.738124		100	0.270324	0.0331041
101	0.0522186	0.0151664		101	0.0332742	0.00844315		101	0.257916	0.138997		101	0.201828	0.0876826		101	0.554854	1.68455		101	0.177322	0.022171
102	0.00606142	0.013586		102	0.0020634	0.00571999		102	0.0878724	0.131556		102	0.0462109	0.0767583		102	0.645412	0.164852		102	0.0106028	0.0151491
103	0.00188846	0.0278731		103	0.00108304	0.00728953		103	0.0490477	0.188433		103	0.0247461	0.0759323		103	0.37339	0.212926		103	0.00410056	0.00523358
104	0.00372288	0.0232513		104	0.00175264	0.0130079		104	0.068866	0.172103		104	0.0275383	0.0912459		104	0.314617	0.460199		104	0.00585444	0.0218998
105	0.0109305	0.0142036		105	0.00115404	0.00887127		105	0.118001	0.134513		105	0.0197343	0.0924464		105	1.45927	0.341757		105	0.0100742	0.0319196
106	0.00655239	0.0584688		106	0.00468816	0.00334609		106	0.0913619	0.272915		106	0.0425194	0.0942771		106	0.212258	0.107841		106	0.0290519	0.0230665
107	0.0172965	0.0274722		107	0.00598157	0.00439348		107	0.148438	0.187073		107	0.0872639	0.0769691		107	0.673698	1.17929		107	0.309782	0.0586104
108	0.00884656	0.0623853		108	0.00349457	0.00922334		108	0.106158	0.281907		108	0.0666997	0.0742392		108	0.694667	0.638408		108	0.0487883	0.136951
109	0.011049	0.0446927		109	0.00314313	0.0102764		109	0.118639	0.238607		109	0.0632569	0.0759942		109	1.41172	0.786486		109	0.0818877	0.424418
110	0.00647051	0.0113544		110	0.00147176	0.0251561		110	0.0907893	0.120267		110	0.0432858	0.101756		110	0.364625	0.976749		110	0.0504233	0.0413405
111	0.01914	0.0178639		111	0.00309219	0.0158558		111	0.156148	0.150853		111	0.0627423	0.0892684		111	1.42429	0.90219		111	0.0844786	0.0224132
112	0.0142049	0.00834019		112	0.00271993	0.00537298		112	0.134519	0.103075		112	0.0588445	0.0534667		112	1.369	0.920135		112	0.0734435	0.0151017
113	0.0115204	0.0365121		113	0.00191235	0.0504081		113	0.121143	0.215667		113	0.0493413	0.171063		113	1.53611	1.13215		113	0.073879	0.070347
114	0.0136145	0.0113078		114	0.00183868	0.00953811		114	0.131694	0.12002		114	0.0483816	0.0836787		114	1.46554	0.825217		114	0.0994187	0.0248618
115	0.0175244	0.0172824		115	0.00289094	0.0448469		115	0.149412	0.148377		115	0.0606661	0.180928		115	1.98	0.805952		115	0.0771498	0.0480694
116	0.0113117	0.035836		116	0.00503609	0.034478		116	0.120041	0.213661		116	0.0800707	0.101404		116	0.486345	0.435181		116	0.0628248	0.0892978
117		0.0259123		117		0.00432039		117		0.181684		117		0.0676888		117		0.294279		117		0.107681
118		0.0309943		118		0.0128393		118		0.198704		118		0.0903032		118		0.454476		118		0.0995851
119		0.0252		119		0.00348978		119		0.17917		119		0.050874		119		0.790719		119		0.129548
120		0.0449529		120		0.022967		120		0.239301		120		0.118987		120		0.350455		120		0.106431
121		0.031892		121		0.00737891		121		0.201561		121		0.0697149		121		0.829581		121		0.0450696
122		0.0294634		122		0.00656148		122		0.193734		122		0.0708675		122		0.644425		122		0.032966
123		0.0253249		123		0.027381		123		0.179613		123		0.0877677		123		1.00992		123		0.198818
124		0.0163089		124		0.0183042		124		0.144138		124		0.094824		124		1.90918		124		0.0150713
125		0.0148294		125		0.0238777		125		0.137445		125		0.128367		125		1.77744		125		0.0341649
126		0.0326182		126		0.0130322		126		0.203843		126		0.0957088		126		0.890573		126		0.0672396
127		0.0335986		127		0.0348494		127		0.206884		127		0.151588		127		1.69483		127		0.0584138
128		0.0246103		128		0.0192392		128		0.177061		128		0.0879776		128		0.73626		128		0.0692156
129		0.0319592		129		0.0166677		129		0.201773		129		0.114016		129		0.661293		129		0.0837411
130		0.0279736		130		0.00857757		130		0.188773		130		0.0715819		130		1.14013		130		0.226074
131		0.0661917		131		0.00791815		131		0.29038		131		0.087086		131		0.240992		131		0.0697104
132		0.0273127		132		0.00508188		132		0.186529		132		0.0732065		132		0.664339		132		0.0100617
133		0.0473657		133		0.00977157		133		0.245639		133		0.103663		133		0.512436		133		0.0733469
134		0.0493252		134		0.0109279		134		0.250668		134		0.0988011		134		1.24776		134		0.194012
135		0.119077		135		0.0114211		135		0.389475		135		0.104545		135		0.153504		135		0.0414076
136		0.0155092		136		0.0238005		136		0.140559		136		0.074755		136		0.425501		136		0.0397012
137		0.0226756		137		0.0156736		137		0.169959		137		0.116647		137		1.40737		137		0.0522611
138		0.0274467		138		0.00984009		138		0.186987		138		0.111925		138		0.20206		138		0.0558846
139		0.0209187		139		0.0186735		139		0.163242		139		0.109336		139		1.49637		139		0.0346419
140		0.0196294		140		0.0383936		140		0.158132		140		0.11201		140		2.17573		140		0.0203485
141		0.0191995		141		0.028662		141		0.15639		141		0.130931		141		2.21308		141		0.029124
142		0.0289224		142		0.0991866		142		0.191947		142		0.2618		142		1.31145		142		0.0556868
143		0.0140915		143		0.00794715		143		0.133981		143		0.0698583		143		0.58513		143		0.0663918
144		0.0212448		144		0.00988321		144		0.16451		144		0.113242		144		1.66496		144		0.0809128
145		0.0370634		145		0.0159236		145		0.217289		145		0.0797543		145		0.383165		145		0.0146536
146		0.0349906		146		0.01103		146		0.211126		146		0.092711		146		1.68458		146		0.0590414
147		0.0152225		147		0.011576		147		0.139254		147		0.0898216		147		0.257622		147		0.0361303
148		0.031545		148		0.00336573		148		0.200461		148		0.0802535		148		0.702434		148		0.0296312
149		0.0255894		149		0.0135496		149		0.180549		149		0.114258		149		1.55189		149		0.0206784
150		0.0188338		150		0.00850748		150		0.154894		150		0.0854004		150		1.17973		150		0.0371924
Summary				Summary				Summary				Summary				Summary				Summary
Mean	0.0159	0.0284		Mean	0.00924	0.0166		Mean	0.128	0.1824		Mean	0.0769738	0.107358		Mean	0.7681	0.8357		Mean	0.0695	0.0807
SD	0.0185	0.0197		SD	0.0161	0.0143		SD	0.0628	0.05448		SD	0.057296	0.0369558		SD	0.5483	0.5694		SD	0.0621	0.0868
Median	0.0096	0.0245		Median	0.00344	0.0127		Median	0.112	0.1767		Median	0.0616216	0.101602		Median	0.6458	0.722		Median	0.0567	0.0486
IQR	0.0052, 0.01952	0.0167, 0.0325		IQR	0.0018, 0.0107	0.00786, 0.0210		IQR	0.0813, 0.1577	0.1459, 0.2033		IQR	0.0427, 0.0896	0.0840, 0.123		IQR	0.3648, 1.0411	0.4094, 1.1474		IQR	0.0252, 0.09393	0.0279, 0.0983
N=	5	3		N=	5	3		N=	5	3		N=	5	3		N=	5	3		N=	5	3
Statistical test	t test, unpaired, Kolmogorov-Smirnov test, p<0.0001			Statistical test	t test, unpaired, Kolmogorov-Smirnov test, p<0.0001			Statistical test	t test, unpaired, Kolmogorov-Smirnov test, p<0.0001			Statistical test	t test, unpaired, Kolmogorov-Smirnov test, p<0.0001			Statistical test	t test, unpaired, Kolmogorov-Smirnov test, p=0.5344			Statistical test	t test, unpaired, Kolmogorov-Smirnov test, p=0.6503
Log-normal fit R2	0.92	0.94		Log-normal fit R2	0.9778	0.9762		Log-normal fit R2	0.95	0.96		Log-normal fit R2	0.8983	0.8855		Log-normal fit R2	0.807	0.7656		Log-normal fit R2	0.8895	0.862
