# Supplementary material for: Ultrastructural comparison of dendritic spine morphology preserved with cryo and chemical fixation
Source: eLife. 2020 Dec 4;9:e56384. doi: 10.7554/eLife.56384 (PMC7748412; doi:10.7554/eLife.56384)
Supplement: Figure 3—source data 1. [file elife-56384-fig3-data1.xlsx]

## Sheet: Sheet1
Figure 3-Source data. Data values and statistics underlying Figure 3
Correlation between neck diameter and neck length								Correlation between neck diameter and head volume								Correlation between head volume and neck length
in cryo-fixed				in chemical-fixed				in cryo-fixed				in chemical-fixed				in cryo-fixed				in chemical-fixed
Spine No.	Neck diamter (μm)	Neck length (μm)		Spine No.	Neck diamter (μm)	Neck length (μm)		Spine No.	Neck diamter (μm)	Head volume (μm3)		Spine No.	Neck diamter (μm)	Head volume (μm3)		Spine No.	Head volume (μm3)	Neck length (μm)		Spine No.	Head volume (μm3)	Neck length (μm)
1	0.131355	1.85848		1	0.119284	0.659874		1	0.131355	0.175921		1	0.119284	0.00883083		1	0.175921	1.85848		1	0.00883083	0.659874
2	0.0960437	0.699815		2	0.173417	0.53326		2	0.0960437	0.19631		2	0.173417	0.0176034		2	0.19631	0.699815		2	0.0176034	0.53326
3	0.0814076	0.462788		3	0.133499	1.30078		3	0.0814076	0.126816		3	0.133499	0.0344657		3	0.126816	0.462788		3	0.0344657	1.30078
4	0.0994699	0.0884421		4	0.208432	0.109082		4	0.0994699	0.0725428		4	0.208432	0.0270851		4	0.0725428	0.0884421		4	0.0270851	0.109082
5	0.191633	0.30241		5	0.168921	0.734613		5	0.191633	0.0217395		5	0.168921	0.045351		5	0.0217395	0.30241		5	0.045351	0.734613
6	0.196556	0.100156		6	0.159501	0.942273		6	0.196556	0.0560595		6	0.159501	0.021988		6	0.0560595	0.100156		6	0.021988	0.942273
7	0.10795	1.4086		7	0.18824	0.41354		7	0.10795	0.0974436		7	0.18824	0.0195344		7	0.0974436	1.4086		7	0.0195344	0.41354
8	0.0663122	0.963852		8	0.219281	1.87208		8	0.0663122	0.0109514		8	0.219281	0.0992791		8	0.0109514	0.963852		8	0.0992791	1.87208
9	0.0867176	1.6514		9	0.243842	0.54372		9	0.0867176	0.0573164		9	0.243842	0.439986		9	0.0573164	1.6514		9	0.439986	0.54372
10	0.0897531	0.611011		10	0.154089	0.881242		10	0.0897531	0.252225		10	0.154089	0.0586473		10	0.252225	0.611011		10	0.0586473	0.881242
11	0.0897897	0.7919		11	0.11638	0.876071		11	0.0897897	0.0699957		11	0.11638	0.0663363		11	0.0699957	0.7919		11	0.0663363	0.876071
12	0.0812842	0.506294		12	0.101986	0.391277		12	0.0812842	0.111305		12	0.101986	0.045314		12	0.111305	0.506294		12	0.045314	0.391277
13	0.127432	2.5862		13	0.169451	0.174965		13	0.127432	0.114792		13	0.169451	0.056158		13	0.114792	2.5862		13	0.056158	0.174965
14	0.431786	0.631776		14	0.152045	1.16931		14	0.431786	0.0484858		14	0.152045	0.0379673		14	0.0484858	0.631776		14	0.0379673	1.16931
15	0.122376	0.411847		15	0.131707	0.688398		15	0.122376	0.131924		15	0.131707	0.0573402		15	0.131924	0.411847		15	0.0573402	0.688398
16	0.059661	0.241402		16	0.212878	0.33981		16	0.0596609	0.0671006		16	0.212878	0.170983		16	0.0671006	0.241402		16	0.170983	0.33981
17	0.158218	0.248489		17	0.221815	0.219741		17	0.158218	0.146258		17	0.221815	0.0347896		17	0.146258	0.248489		17	0.0347896	0.219741
18	0.112962	0.257998		18	0.180681	0.773694		18	0.112962	0.0449167		18	0.180681	0.140511		18	0.0449167	0.257998		18	0.140511	0.773694
19	0.112061	1.6841		19	0.115796	0.627443		19	0.112061	0.0590409		19	0.115796	0.00128422		19	0.0590409	1.6841		19	0.00128422	0.627443
20	0.0612302	0.729933		20	0.141901	0.520295		20	0.0612302	0.117945		20	0.141901	0.0527995		20	0.117945	0.729933		20	0.0527995	0.520295
21	0.110209	0.162898		21	0.177947	0.157127		21	0.110209	0.0400001		21	0.177947	0.264134		21	0.0400001	0.162898		21	0.264134	0.157127
22	0.0787868	2.66112		22	0.226461	0.642415		22	0.0787868	0.00904986		22	0.226461	0.0418011		22	0.00904986	2.66112		22	0.0418011	0.642415
23	0.0749049	1.79589		23	0.155241	1.10442		23	0.0749049	0.0397368		23	0.155241	0.0280949		23	0.0397368	1.79589		23	0.0280949	1.10442
24	0.118895	1.04219		24	0.144743	1.2149		24	0.118895	0.123719		24	0.144743	0.0677965		24	0.123719	1.04219		24	0.0677965	1.2149
25	0.0640652	0.619386		25	0.125916	0.614866		25	0.0640652	0.0182742		25	0.125916	0.03053		25	0.0182742	0.619386		25	0.03053	0.614866
26	0.0994389	0.140876		26	0.163257	0.0807476		26	0.0994389	0.00763951		26	0.163257	0.0107416		26	0.00763951	0.140876		26	0.0107416	0.0807476
27	0.0583525	0.971958		27	0.157394	1.35042		27	0.0583525	0.128892		27	0.157394	0.0282367		27	0.128892	0.971958		27	0.0282367	1.35042
28	0.147553	0.72562		28	0.183062	0.257913		28	0.147553	0.0136123		28	0.183062	0.0225692		28	0.0136123	0.72562		28	0.0225692	0.257913
29	0.163728	0.82082		29	0.240859	0.111818		29	0.163728	0.0194918		29	0.240859	0.175188		29	0.0194918	0.82082		29	0.175188	0.111818
30	0.111145	1.05843		30	0.237596	0.174155		30	0.111145	0.0245864		30	0.237596	0.0210169		30	0.0245864	1.05843		30	0.0210169	0.174155
31	0.247691	0.506531		31	0.146044	0.21418		31	0.247691	0.0588977		31	0.146044	0.048441		31	0.0588977	0.506531		31	0.048441	0.21418
32	0.182517	0.722069		32	0.198785	1.8005		32	0.182517	0.142623		32	0.198785	0.0299235		32	0.142623	0.722069		32	0.0299235	1.8005
33	0.199739	1.05415		33	0.27847	1.07065		33	0.199739	0.094629		33	0.27847	0.113188		33	0.094629	1.05415		33	0.113188	1.07065
34	0.186073	0.176235		34	0.171801	0.640454		34	0.186073	0.0644591		34	0.171801	0.0583852		34	0.0644591	0.176235		34	0.0583852	0.640454
35	0.13281	1.12736		35	0.156043	0.556329		35	0.13281	0.0636817		35	0.156043	0.0340238		35	0.0636817	1.12736		35	0.0340238	0.556329
36	0.154066	0.141796		36	0.12395	1.61034		36	0.154066	0.0702966		36	0.12395	0.0265217		36	0.0702966	0.141796		36	0.0265217	1.61034
37	0.162117	0.307025		37	0.227319	1.08954		37	0.162117	0.0369596		37	0.227319	0.137881		37	0.0369596	0.307025		37	0.137881	1.08954
38	0.201392	1.14517		38	0.145302	0.517831		38	0.201392	0.0332619		38	0.145302	0.0291839		38	0.0332619	1.14517		38	0.0291839	0.517831
39	0.186249	0.235279		39	0.0864323	1.10934		39	0.186249	0.0588977		39	0.0864323	0.0207099		39	0.0588977	0.235279		39	0.0207099	1.10934
40	0.278302	0.700363		40	0.139341	1.7359		40	0.278302	0.142623		40	0.139341	0.0257978		40	0.142623	0.700363		40	0.0257978	1.7359
41	0.158457	0.83817		41	0.0834274	0.0870512		41	0.158457	0.0204726		41	0.0834274	0.00487089		41	0.0204726	0.83817		41	0.00487089	0.0870512
42	0.241538	1.37966		42	0.147259	0.423757		42	0.241538	0.0636817		42	0.147259	0.0674369		42	0.0636817	1.37966		42	0.0674369	0.423757
43	0.12707	0.104574		43	0.147222	0.198774		43	0.12707	0.105178		43	0.147222	0.0386617		43	0.105178	0.104574		43	0.0386617	0.198774
44	0.0949455	0.151481		44	0.11988	1.27264		44	0.0949455	0.0511401		44	0.11988	0.0317443		44	0.0511401	0.151481		44	0.0317443	1.27264
45	0.106406	0.652369		45	0.175612	2.54073		45	0.106406	0.0584512		45	0.175612	0.0196316		45	0.0584512	0.652369		45	0.0196316	2.54073
46	0.221562	0.939245		46	0.317584	0.344661		46	0.221562	0.0274511		46	0.317584	0.0637228		46	0.0274511	0.939245		46	0.0637228	0.344661
47	0.183591	0.616982		47	0.131479	0.300843		47	0.183591	0.0283942		47	0.131479	0.0338421		47	0.0283942	0.616982		47	0.0338421	0.300843
48	0.148339	0.088431		48	0.266281	0.567867		48	0.148339	0.110254		48	0.266281	0.0535354		48	0.110254	0.088431		48	0.0535354	0.567867
49	0.131769	0.0656899		49	0.133217	0.645014		49	0.131769	0.0702966		49	0.133217	0.0207457		49	0.0702966	0.0656899		49	0.0207457	0.645014
50	0.232715	0.939699		50	0.19238	0.808049		50	0.232715	0.0369596		50	0.19238	0.191399		50	0.0369596	0.939699		50	0.191399	0.808049
51	0.200684	1.46233		51	0.135668	1.1912		51	0.200684	0.0332619		51	0.135668	0.116995		51	0.0332619	1.46233		51	0.116995	1.1912
52	0.121515	0.998332		52	0.110882	0.352912		52	0.121515	0.064163		52	0.110882	0.178904		52	0.064163	0.998332		52	0.178904	0.352912
53	0.188203	0.856616		53	0.176334	1.03		53	0.188203	0.0639953		53	0.176334	0.205717		53	0.0639953	0.856616		53	0.205717	1.03
54	0.109574	0.2597		54	0.157378	0.604356		54	0.109574	0.0362266		54	0.157378	0.0633645		54	0.0362266	0.2597		54	0.0633645	0.604356
55	0.0993853	0.549907		55	0.208076	0.826959		55	0.0993853	0.0247869		55	0.208076	0.279952		55	0.0247869	0.549907		55	0.279952	0.826959
56	0.0898255	0.498194		56	0.1842	0.904934		56	0.0898255	0.0594574		56	0.1842	0.0976611		56	0.0594574	0.498194		56	0.0976611	0.904934
57	0.136357	0.68532		57	0.193156	0.187361		57	0.136357	0.0778237		57	0.193156	0.0317515		57	0.0778237	0.68532		57	0.0317515	0.187361
58	0.184767	0.552833		58	0.44492	0.397124		58	0.184767	0.0358023		58	0.44492	0.029497		58	0.0358023	0.552833		58	0.029497	0.397124
59	0.151257	0.941977		59	0.14886	0.550149		59	0.151257	0.023405		59	0.14886	0.174711		59	0.023405	0.941977		59	0.174711	0.550149
60	0.190905	0.403596		60	0.19527	0.202697		60	0.190905	0.021942		60	0.19527	0.443171		60	0.021942	0.403596		60	0.443171	0.202697
61	0.187837	0.484787		61	0.152727	0.717941		61	0.187837	0.0144546		61	0.152727	0.0980236		61	0.0144546	0.484787		61	0.0980236	0.717941
62	0.101388	0.381107		62	0.180667	0.730923		62	0.101388	0.0351429		62	0.180667	0.0759167		62	0.0351429	0.381107		62	0.0759167	0.730923
63	0.065581	0.54062		63	0.240355	0.573335		63	0.0655809	0.152157		63	0.240355	0.0287845		63	0.152157	0.54062		63	0.0287845	0.573335
64	0.0729029	1.14684		64	0.209345	0.93223		64	0.0729029	0.0138534		64	0.209345	0.0617573		64	0.0138534	1.14684		64	0.0617573	0.93223
65	0.0593749	0.768454		65	0.19909	0.715519		65	0.0593749	0.0168446		65	0.19909	0.0549527		65	0.0168446	0.768455		65	0.0549527	0.715519
66	0.0795056	1.84936		66	0.309972	0.270574		66	0.0795055	0.0234759		66	0.309972	0.0429623		66	0.0234759	1.84936		66	0.0429623	0.270574
67	0.104223	0.43557		67	0.318045	2.34798		67	0.104223	0.182505		67	0.318045	0.316928		67	0.182505	0.43557		67	0.316928	2.34798
68	0.295816	0.246236		68	0.338677	0.338452		68	0.295816	0.0582667		68	0.338677	0.320389		68	0.0582667	0.246236		68	0.320389	0.338452
69	0.0597892	0.277502		69	0.224344	0.602626		69	0.0597893	0.133554		69	0.224344	0.0613539		69	0.133554	0.277502		69	0.0613539	0.602626
70	0.105472	0.644673		70	0.256763	0.183598		70	0.105472	0.0849465		70	0.256763	0.320389		70	0.0849465	0.644673		70	0.320389	0.183598
71	0.123119	0.646099		71	0.191388	0.943715		71	0.123119	0.0993836		71	0.191388	0.0577406		71	0.0993836	0.646099		71	0.0577406	0.943715
72	0.0529432	0.516091		72	0.162468	0.171042		72	0.0529432	0.0208327		72	0.162468	0.0712358		72	0.0208327	0.516091		72	0.0712358	0.171042
73	0.0768074	0.419139		73	0.18103	1.73807		73	0.0768074	0.0415804		73	0.18103	0.0530588		73	0.0415804	0.419139		73	0.0530588	1.73807
74	0.111501	0.524258		74	0.260073	1.86469		74	0.111501	0.0110459		74	0.260073	0.13137		74	0.0110459	0.524258		74	0.13137	1.86469
75	0.0543438	0.365344		75	0.191407	0.7061		75	0.0543438	0.0314977		75	0.191407	0.194727		75	0.0314977	0.365344		75	0.194727	0.7061
76	0.132105	0.461094		76	0.126589	1.3266		76	0.132105	0.104051		76	0.126589	0.0261256		76	0.104051	0.461094		76	0.0261256	1.3266
77	0.0803673	0.603994		77	0.147824	0.637487		77	0.0803673	0.0235243		77	0.147824	0.0359203		77	0.0235243	0.603994		77	0.0359203	0.637487
78	0.0606357	0.527961		78	0.186882	0.726215		78	0.0606357	0.0312433		78	0.186882	0.0081551		78	0.0312433	0.527961		78	0.0081551	0.726215
79	0.0704465	0.960221		79	0.160463	0.203182		79	0.0704465	0.0692739		79	0.160463	0.027253		79	0.0692739	0.960221		79	0.027253	0.203182
80	0.0931484	0.717332		80	0.155061	0.937576		80	0.0931484	0.0492991		80	0.155061	0.0304621		80	0.0492991	0.717332		80	0.0304621	0.937576
81	0.0697313	0.737652		81	0.180493	0.779088		81	0.0697313	0.0687741		81	0.180493	0.0240064		81	0.0687741	0.737652		81	0.0240064	0.779088
82	0.0521663	0.169193		82	0.119461	0.60979		82	0.0521663	0.019541		82	0.119461	0.3076		82	0.019541	0.169193		82	0.3076	0.60979
83	0.0681464	0.781609		83	0.118733	0.537498		83	0.0681464	0.0254593		83	0.118733	0.0173234		83	0.0254593	0.781609		83	0.0173234	0.537498
84	0.0724158	1.78239		84	0.187358	1.75721		84	0.0724158	0.117864		84	0.187358	0.0487877		84	0.117864	1.78239		84	0.0487877	1.75721
85	0.0994238	1.38713		85	0.146183	0.752514		85	0.0994238	0.0869223		85	0.146183	0.057175		85	0.0869223	1.38713		85	0.057175	0.752514
86	0.145411	1.70154		86	0.182978	1.2649		86	0.145411	0.050643		86	0.182978	0.0459448		86	0.050643	1.70154		86	0.0459448	1.2649
87	0.0753377	0.893029		87	0.200961	1.34885		87	0.0753377	0.0149609		87	0.200961	0.144798		87	0.0149609	0.893029		87	0.144798	1.34885
88	0.112007	0.53113		88	0.210628	0.415608		88	0.112007	0.365758		88	0.210628	0.156995		88	0.365758	0.53113		88	0.156995	0.415608
89	0.130884	2.0262		89	0.168134	3.21214		89	0.130884	0.0918554		89	0.168134	0.111971		89	0.0918554	2.0262		89	0.111971	3.21214
90	0.0693975	1.15844		90	0.203142	0.733081		90	0.0693975	0.0321074		90	0.203142	0.255766		90	0.0321074	1.15844		90	0.255766	0.733081
91	0.075147	0.263411		91	0.13664	2.07566		91	0.075147	0.0108776		91	0.13664	0.165374		91	0.0108776	0.263411		91	0.165374	2.07566
92	0.0687656	1.038		92	0.200292	0.17975		92	0.0687656	0.0459639		92	0.200292	0.0201387		92	0.0459639	1.038		92	0.0201387	0.17975
93	0.0869073	0.663802		93	0.134703	0.891423		93	0.0869073	0.0976477		93	0.134703	0.0255108		93	0.0976477	0.663802		93	0.0255108	0.891423
94	0.104157	0.0295122		94	0.146208	0.591613		94	0.104157	0.00655567		94	0.146208	0.195272		94	0.00655567	0.0295122		94	0.195272	0.591613
95	0.309157	0.154484		95	0.16271	1.32089		95	0.309157	0.0414385		95	0.16271	0.016345		95	0.0414385	0.154484		95	0.016345	1.32089
96	0.22039	0.26446		96	0.14024	1.12996		96	0.22039	0.00994773		96	0.14024	0.174726		96	0.00994773	0.26446		96	0.174726	1.12996
97	0.0861529	0.965862		97	0.169108	0.728599		97	0.0861529	0.0511529		97	0.169108	0.0272235		97	0.0511529	0.965862		97	0.0272235	0.728599
98	0.18266	0.205304		98	0.173048	1.16917		98	0.18266	0.0251097		98	0.173048	0.0731819		98	0.0251097	0.205304		98	0.0731819	1.16917
99	0.118176	0.192727		99	0.199757	0.365239		99	0.118176	0.0444393		99	0.199757	0.0409383		99	0.0444393	0.192727		99	0.0409383	0.365239
100	0.185022	1.32878		100	0.138529	0.738124		100	0.185022	0.270324		100	0.138529	0.0331041		100	0.270324	1.32878		100	0.0331041	0.738124
101	0.257916	0.554854		101	0.138997	1.68455		101	0.257916	0.177322		101	0.138997	0.022171		101	0.177322	0.554854		101	0.022171	1.68455
102	0.0878724	0.645412		102	0.131556	0.164852		102	0.0878724	0.0106028		102	0.131556	0.0151491		102	0.0106028	0.645412		102	0.0151491	0.164852
103	0.0490477	0.37339		103	0.188433	0.212926		103	0.0490477	0.00410056		103	0.188433	0.00523358		103	0.00410056	0.37339		103	0.00523358	0.212926
104	0.068866	0.314617		104	0.172103	0.460199		104	0.068866	0.00585444		104	0.172103	0.0218998		104	0.00585444	0.314617		104	0.0218998	0.460199
105	0.118001	1.45927		105	0.134513	0.341757		105	0.118001	0.0100742		105	0.134513	0.0319196		105	0.0100742	1.45927		105	0.0319196	0.341757
106	0.0913619	0.212258		106	0.272915	0.107841		106	0.0913619	0.0290519		106	0.272915	0.0230665		106	0.0290519	0.212258		106	0.0230665	0.107841
107	0.148438	0.673698		107	0.187073	1.17929		107	0.148438	0.309782		107	0.187073	0.0586104		107	0.309782	0.673698		107	0.0586104	1.17929
108	0.106158	0.694667		108	0.281907	0.638408		108	0.106158	0.0487883		108	0.281907	0.136951		108	0.0487883	0.694667		108	0.136951	0.638408
109	0.118639	1.41172		109	0.238607	0.786486		109	0.118639	0.0818877		109	0.238607	0.424418		109	0.0818877	1.41172		109	0.424418	0.786486
110	0.0907893	0.364625		110	0.120267	0.976749		110	0.0907893	0.0504233		110	0.120267	0.0413405		110	0.0504233	0.364625		110	0.0413405	0.976749
111	0.156148	1.42429		111	0.150853	0.90219		111	0.156148	0.0844786		111	0.150853	0.0224132		111	0.0844786	1.42429		111	0.0224132	0.90219
112	0.134519	1.369		112	0.103075	0.920135		112	0.134519	0.0734435		112	0.103075	0.0151017		112	0.0734435	1.369		112	0.0151017	0.920135
113	0.121143	1.53611		113	0.215667	1.13215		113	0.121143	0.073879		113	0.215667	0.070347		113	0.073879	1.53611		113	0.070347	1.13215
114	0.131694	1.46554		114	0.12002	0.825217		114	0.131694	0.0994187		114	0.12002	0.0248618		114	0.0994187	1.46554		114	0.0248618	0.825217
115	0.149412	1.98		115	0.148377	0.805952		115	0.149412	0.0771498		115	0.148377	0.0480694		115	0.0771498	1.98		115	0.0480694	0.805952
116	0.120041	0.486345		116	0.213661	0.435181		116	0.120041	0.121946		116	0.213661	0.0892978		116	0.0628248	0.486345		116	0.0892978	0.435181
Summary				117	0.181684	0.294279		Summary				117	0.181684	0.107681		Summary				117	0.107681	0.294279
n=	116			118	0.198704	0.454476		n=	116			118	0.198704	0.0995851		n=	116			118	0.0995851	0.454476
N=	5			119	0.17917	0.790719		N=	5			119	0.17917	0.129548		N=	5			119	0.129548	0.790719
Statistic test	Spearman r, r=-0.02012, p=0.8302			120	0.239301	0.350455		Statistic test	Spearman r, r=0.1447, p=0.1212			120	0.239301	0.106431		Statistic test	Spearman r, r=0.1243, p=0.1837			120	0.106431	0.350455
				121	0.201561	0.829581						121	0.201561	0.0450696						121	0.0450696	0.829581
				122	0.193734	0.644425						122	0.193734	0.032966						122	0.032966	0.644425
				123	0.179613	1.00992						123	0.179613	0.198818						123	0.198818	1.00992
				124	0.144138	1.90918						124	0.144138	0.0150713						124	0.0150713	1.90918
				125	0.137445	1.77744						125	0.137445	0.0341649						125	0.0341649	1.77744
				126	0.203843	0.890573						126	0.203843	0.0672395						126	0.0672395	0.890573
				127	0.206884	1.69483						127	0.206884	0.0584138						127	0.0584138	1.69483
				128	0.177061	0.73626						128	0.177061	0.0692156						128	0.0692156	0.73626
				129	0.201773	0.661293						129	0.201773	0.0837411						129	0.0837411	0.661293
				130	0.188773	1.14013						130	0.188773	0.226074						130	0.226074	1.14013
				131	0.29038	0.240992						131	0.29038	0.0697104						131	0.0697104	0.240992
				132	0.186529	0.664339						132	0.186529	0.0100617						132	0.0100617	0.664339
				133	0.245639	0.512436						133	0.245639	0.0733469						133	0.0733469	0.512436
				134	0.250668	1.24776						134	0.250668	0.194012						134	0.194012	1.24776
				135	0.389475	0.153504						135	0.389475	0.0414076						135	0.0414076	0.153504
				136	0.140559	0.425501						136	0.140559	0.0397011						136	0.0397011	0.425501
				137	0.169959	1.40737						137	0.169959	0.0522611						137	0.0522611	1.40737
				138	0.186987	0.20206						138	0.186987	0.0558846						138	0.0558846	0.20206
				139	0.163242	1.49637						139	0.163242	0.0346419						139	0.0346419	1.49637
				140	0.158132	2.17573						140	0.158132	0.0203485						140	0.0203485	2.17573
				141	0.15639	2.21308						141	0.15639	0.029124						141	0.029124	2.21308
				142	0.191947	1.31145						142	0.191947	0.0556868						142	0.0556868	1.31145
				143	0.133981	0.58513						143	0.133981	0.0663918						143	0.0663918	0.58513
				144	0.16451	1.66496						144	0.16451	0.0809128						144	0.0809128	1.66496
				145	0.217289	0.383165						145	0.217289	0.0146536						145	0.0146536	0.383165
				146	0.211126	1.68458						146	0.211126	0.0590414						146	0.0590414	1.68458
				147	0.139254	0.257622						147	0.139254	0.0361303						147	0.0361303	0.257622
				148	0.200461	0.702434						148	0.200461	0.0296312						148	0.0296312	0.702434
				149	0.180549	1.55189						149	0.180549	0.0206784						149	0.0206784	1.55189
				150	0.154894	1.17973						150	0.154894	0.0371923						150	0.0371923	1.17973
				Summary								Summary								Summary
				n=	150							n=	150							n=	150
				N=	3							N=	3							N=	3
				Statistic test	Spearman r, r=-0.1547, p=0.0587							Statistic test	Spearman r, r=0.3581, p<0.0001							Statistic test	Spearman r, r=0.04411, p=0.5920
