# Supplementary material for: Ultrastructural comparison of dendritic spine morphology preserved with cryo and chemical fixation
Source: eLife. 2020 Dec 4;9:e56384. doi: 10.7554/eLife.56384 (PMC7748412; doi:10.7554/eLife.56384)
Supplement: Figure 4—source data 1. [file elife-56384-fig4-data1.xlsx]

## Sheet: Sheet1
Figure 4-Source data. Data values and statistics underlying Figure 4
Neck length (μm)								Neck diameter								Spine head volume (μm3)
in Cryo-fixation				in Chemical-fixation				in Cryo-fixation				in Chemical-fixation				in Cryo-fixation				in Chemical-fixation
	ER-	ER+			ER-	ER+			ER-	ER+			ER-	ER+			ER-	ER+			ER-	ER+
1	0.411847	0.506294		1	1.3266	0.637487		1	0.122376	0.0812842		1	0.126589	0.147824		1	0.131924	0.111305		1	0.0261256	0.0359203
2	0.241402	2.5862		2	0.726215	0.60979		2	0.0596609	0.127432		2	0.186882	0.119461		2	0.0671006	0.114792		2	0.00815511	0.3076
3	0.257998	0.631776		3	0.203182	1.2649		3	0.112962	0.431786		3	0.160463	0.182978		3	0.0449167	0.0484858		3	0.027253	0.0459448
4	2.66112	0.248489		4	0.937576	1.34885		4	0.0787868	0.158218		4	0.155061	0.200961		4	0.00904986	0.146258		4	0.0304621	0.144798
5	1.79589	1.6841		5	0.779088	0.415608		5	0.0749049	0.112061		5	0.180493	0.210628		5	0.0397368	0.0590409		5	0.0240064	0.156995
6	0.619386	0.729933		6	0.537498	3.21214		6	0.0640652	0.0612302		6	0.118733	0.168134		6	0.0182742	0.117945		6	0.0173234	0.111971
7	0.140876	0.162898		7	1.75721	0.733081		7	0.0994389	0.110209		7	0.187358	0.203142		7	0.00763951	0.0400001		7	0.0487877	0.255766
8	0.572532	1.04219		8	0.752514	2.07566		8	0.0950641	0.118895		8	0.146183	0.13664		8	0.0115078	0.123719		8	0.057175	0.165374
9	0.72562	0.971958		9	0.17975	0.591613		9	0.147553	0.0583525		9	0.200292	0.146208		9	0.0136123	0.128892		9	0.0201387	0.195272
10	0.82082	0.265186		10	0.891423	1.12996		10	0.163728	0.250294		10	0.134703	0.14024		10	0.0194918	0.0865653		10	0.0255108	0.174726
11	0.506531	0.725646		11	1.32089	1.17929		11	0.247691	0.0930542		11	0.16271	0.187073		11	0.0588977	0.0257665		11	0.016345	0.0586104
12	1.05415	1.05843		12	0.728599	0.638408		12	0.199739	0.111145		12	0.169108	0.281907		12	0.094629	0.0245864		12	0.0272235	0.136951
13	0.176235	0.722069		13	1.16917	0.786486		13	0.186073	0.182517		13	0.173048	0.238607		13	0.0644591	0.142623		13	0.073182	0.424418
14	1.12736	0.141796		14	0.365239	0.805952		14	0.13281	0.154066		14	0.199757	0.148377		14	0.0636817	0.0702966		14	0.0409383	0.0480694
15	0.307025	0.700363		15	0.738124	0.294279		15	0.162117	0.278302		15	0.138529	0.181684		15	0.0369596	0.142623		15	0.0331041	0.107681
16	1.14517	0.151481		16	1.68455	0.454476		16	0.201392	0.0949455		16	0.138997	0.198704		16	0.0332619	0.0511401		16	0.022171	0.0995851
17	0.235279	0.652369		17	0.164852	0.350455		17	0.186249	0.106406		17	0.131556	0.239301		17	0.0588977	0.0584512		17	0.0151491	0.106431
18	0.83817	0.939245		18	0.212926	0.829581		18	0.158457	0.221562		18	0.188433	0.201561		18	0.0204726	0.0274511		18	0.00523358	0.0450696
19	1.37966	0.0656899		19	0.460199	1.00992		19	0.241538	0.131769		19	0.172103	0.179613		19	0.0636817	0.0702966		19	0.0218998	0.198818
20	0.104574	1.46233		20	0.341757	0.890573		20	0.12707	0.200684		20	0.134513	0.203843		20	0.105178	0.0332619		20	0.0319196	0.0672396
21	0.616982	0.856616		21	0.107841	1.69483		21	0.183591	0.188203		21	0.272915	0.206884		21	0.0283942	0.0639953		21	0.0230665	0.0584138
22	0.088431	0.68532		22	0.976749	0.661293		22	0.148339	0.136357		22	0.120267	0.201773		22	0.110254	0.0778237		22	0.0413405	0.0837411
23	0.939699	0.403596		23	0.920135	1.14013		23	0.232715	0.190905		23	0.103075	0.188773		23	0.0369596	0.021942		23	0.0151017	0.226074
24	0.998332	0.484787		24	1.13215	0.240992		24	0.121515	0.187837		24	0.215667	0.29038		24	0.064163	0.0144546		24	0.070347	0.0697104
25	0.2597	0.43557		25	0.825217	0.512436		25	0.109574	0.104223		25	0.12002	0.245639		25	0.0362266	0.182505		25	0.0248618	0.0733469
26	0.549907	0.246236		26	0.435181	1.24776		26	0.0993853	0.295816		26	0.213661	0.250668		26	0.0247869	0.0582667		26	0.0892978	0.194012
27	0.552833	0.644673		27	0.790719	0.153504		27	0.184767	0.105472		27	0.17917	0.389475		27	0.0358023	0.0849465		27	0.129548	0.0414076
28	0.941977	0.646099		28	0.644425	0.425501		28	0.151257	0.123119		28	0.193734	0.140559		28	0.023405	0.0993836		28	0.032966	0.0397012
29	0.381107	0.365344		29	1.90918	1.31145		29	0.101388	0.0543438		29	0.144138	0.191947		29	0.0351429	0.0314977		29	0.0150713	0.0556868
30	0.54062	0.461094		30	1.77744	1.68458		30	0.0655809	0.132105		30	0.137445	0.211126		30	0.152157	0.104051		30	0.0341649	0.0590414
31	1.14684	0.603994		31	0.73626	0.702434		31	0.0729029	0.0803673		31	0.177061	0.200461		31	0.0138534	0.0235243		31	0.0692156	0.0296312
32	0.768454	0.527961		32	0.664339	1.55189		32	0.0593749	0.0606357		32	0.186529	0.180549		32	0.0168446	0.0312433		32	0.0100617	0.0206784
33	1.84936	0.960221		33	1.40737	1.17973		33	0.0795055	0.0704465		33	0.169959	0.154894		33	0.0234759	0.0692739		33	0.0522611	0.0371924
34	0.277502	0.717332		34	0.20206	0.90219		34	0.0597893	0.0931484		34	0.186987	0.150853		34	0.133554	0.0492991		34	0.0558846	0.0224132
35	0.516091	0.737652		35	1.49637			35	0.0529432	0.0697313		35	0.163242			35	0.0208327	0.0687741		35	0.0346419
36	0.524258	1.78239		36	2.17573			36	0.111501	0.0724158		36	0.158132			36	0.0110459	0.117864		36	0.0203485
37	0.169193	1.38713		37	2.21308			37	0.0521663	0.0994238		37	0.15639			37	0.019541	0.0869223		37	0.029124
38	0.781609	0.696715		38	1.66496			38	0.0681464	0.112007		38	0.16451			38	0.0254593	0.365758		38	0.0809128
39	1.70154	0.694918		39	0.383165			39	0.145411	0.130884		39	0.217289			39	0.050643	0.0918554		39	0.0146536
40	0.893029	0.69312		40	0.257622			40	0.0753377	0.0693975		40	0.139254			40	0.0149609	0.0321074		40	0.0361303
41	1.038	0.691323		41	0.58513			41	0.0687656	0.075147		41	0.133981			41	0.0459639	0.0108776		41	0.0663918
42	0.154484	0.689525		Summary				42	0.309157	0.0869073			Summary			42	0.0414385	0.0976477			Summary
43	0.26446	0.687728		Mean	0.8923	0.9608		43	0.22039	0.104157		Mean	0.1649	0.1977		43	0.00994773	0.00655567		Mean	0.03701	0.1147
44	0.965862	0.685931		SD	0.5813	0.6059		44	0.0861529	0.18266		SD	0.0336	0.0527		44	0.0511529	0.0251097		SD	0.02558	0.09156
45	0.192727	0.684133		Median	0.7525	0.8178		45	0.118176	0.185022		Median	0.1632	0.1953		45	0.0444393	0.270324		Median	0.02912	0.07854
46	0.645412	0.682336		IQR	0.4092, 1.324	0.5718, 1.252		46	0.0878724	0.257916		IQR	0.138, 0.1869	0.154, 0.211		46	0.0106028	0.177322		IQR	0.02024, 0.05052	0.04573, 0.1677
47	0.37339	0.680539		n=	75			47	0.0490477	0.068866		n=	75			47	0.00410056	0.00585444		n=	75
48	1.45927	0.678741		Statistic test	Turkey's multiple comparison, p=0.95			48	0.118001	0.0913619		Statistic test	Turkey's multiple comparison, p=0.08			48	0.0100742	0.0290519		Statistic test	Turkey's multiple comparison, p<0.0001
49	0.498194							49	0.0898255							49	0.0594574
50	0.419139							50	0.0768074							50	0.0415804
Summary									Summary								Summary
Mean	0.6836	0.7264						Mean	0.1252	0.1357						Mean	0.04437	0.07861
SD	0.5175	0.447						SD	0.0606	0.0747						SD	0.03347	0.06509
Median	0.5499	0.6847						Median	0.1122	0.1116						Median	0.03696	0.06179
IQR	0.2597, 0.9420	0.4789, 0.7674						IQR	0.07523, 0.1625	0.08269, 0.1826						IQR	0.01949, 0.05946	0.03143, 0.1059
n=	98							n=	98							n=	98
Statistic test	Turkey's multiple comparison, p=1.0							Statistic test	Turkey's multiple comparison, p=0.81							Statistic test	Turkey's multiple comparison, p=0.007
