# Supplementary material for: Ultrastructural comparison of dendritic spine morphology preserved with cryo and chemical fixation
Source: eLife journal article supplement (doi:10.7554/elife.56384), 2020-12-04
Supplement: supp [file elife-56384-supp-v1.zip]

Archive with 10 entries (10 files):
- elife_poa_e56384_Transparent_Reporting_File.pdf
- elife_poa_e56384_Figure_1_figure_supplement_1.pdf
- elife_poa_e56384_Figure_2_figure_supplement_1.pdf
- elife_poa_e56384_Figure_1_source_data_1.xlsx
- elife_poa_e56384_Figure_2_source_data_1.xlsx
- elife_poa_e56384_Figure_3_source_data_1.xlsx
- elife_poa_e56384_Figure_4_source_data_1.xlsx
- elife_poa_e56384_Figure_5_source_data_1.xlsx
- elife_poa_e56384_Figure_1_figure_supplement_1_source_data_1.xlsx
- elife_poa_e56384_Figure_2_figure_supplement_1_source_data_1.xlsx
