# Supplementary material for: Ultrastructural comparison of dendritic spine morphology preserved with cryo and chemical fixation
Source: eLife journal article supplement (doi:10.7554/elife.56384), 2020-12-04
Supplement: supp [file elife-56384-supp-v1.zip › elife_poa_e56384_Figure_1_source_data_1.xlsx]

## Sheet: Sheet1
Figure 1 -Source data. Data values and statistics underlying Figure 1I
CV neck diameter (%)
Spine No.	cryo-fixed	chemical-fixed
1	25.3415	7.48
2	21.007	14.69
3	26.9113	14.14
4	24.2137	2.13
5	21.1209	7.39
6	16.0867	13.94
7	15.7469	16.54
8	21.3518	22.97
9	6.01063	6.3
10	4.67195	13.77
11	4.59835	17.93
12	18.5384	12.66
13	55.0857	12.02
14	5.96033	18.49
15	17.2613	14.36
16	13.2036	11.73
17	15.7135	5.91
18	11.7602	11.11
19	28.973	12.08
20	22.168	10.47
21	20.3019	14.43
22	27.8614	18.63
23	35.2014	18.52
24	25.2065	12.06
25	18.2578	15.58
26	10.1418	3.86
27	31.0572	11.87
28	12.4803	17.6
29	29.6409	12.89
30	9.24911	2.31
31	12.8029	12.45
32	8.93175	19.89
33	14.7213	22.13
34	13.1036	14.43
35	20.1034	12.24
36	4.94119	19.93
37	13.2095	24.71
38	19.1569	14.1
39	10.8029	14.22
40	5.7146	29.14
41	25.5804	2.72
42	23.5435	12.87
43	10.9883	13.3
44	15.7543	20.1
45	10.5137	21.32
46	15.3347	6.97
47	6.9587	11.06
48	2.49022	11.86
49	14.1341	15.87
50	15.8245	14.33
51	17.7431	10.18
52	14.2511	9.14
53	26.6016	7.83
54	6.65255	11.03
55	24.6234	15.85
56	20.2381	15.77
57	14.2842	1.83
58	30.4273	19.45
59	31.5795	10.6
60	17.0402	10.48
61	20.189	9.65
62	7.30083	20.47
63	6.31462	22.08
64	15.7627	4.57
65	14.6471	26.32
66	36.1551	9.9
67	27.7357	4.24
68	2.98612	28.98
69	13.9688	10.28
70	23.4413	4.3
71	39.7939	11.18
72	17.8671	0.3
73	20.1888	14.25
74	27.3703	4.76
75	14.6069	29.99
76	33.8079	21.35
77	17.8543	13.33
78	8.97472	33.19
79	15.446	22.67
80	18.3798	2.85
81	29.1221	16.18
82	11.63	11.59
83	12.887	15.16
84	36.7207	18.13
85	60.8865	9.03
86	62.7942	10.65
87	30.0942	25.99
88	12.5042	10.62
89	79.258	11.15
90	16.5751	21.52
91	25.9319	37.87
92	14.4316	18.02
93	14.9391	22.94
94	2.32149	27.59
95	2.13757	10.55
96	8.12753	24.2
97	26.012	29.13
98	16.4386	14.54
99	37.6163	6.55
100	22.483	13.4
101	9.14831	15.61
102	23.1604	23.69
103	10.9919	22.26
104	24.4211	19.67
105	66.4127	23.56
106	24.1897	18.16
107	24.0907	17.44
108	19.5858	17.03
109	37.5225	6.62
110	43.0472	16.47
111	31.5331	8.98
112	29.1634	33.34
113	32.2686	7.94
114	38.3473	23.53
115	51.9091	11.31
116	18.6058	21.47
117		21.91
118		13.98
119		23.3
120		14.64
121		11.9
122		21.01
123		7.98
124		15.53
125		14.4
126		16.95
127		8.19
128		25.23
129		15.27
130		16.68
131		12.3
132		26.73
133		19.66
134		21.16
135		20.57
136		10.8
137		18.72
138		0
139		12.66
140		23.44
141		20.07
142		1.84
143		23.68
144		21.2
145		26.54
146		28.72
147		11.47
148		18.09
149		18.4
150		17.04
Summary
Mean	21.15	15.44
SD	13.52	7.254
Median	18.3188	14.5
IQR	12.82 - 26.83	10.76 - 20.50
N=	5	3
Statistical test	t test, unpaired, Kolmogorov-Smirnov test, p=0.0012
