# Supplementary material for: Ultrastructural comparison of dendritic spine morphology preserved with cryo and chemical fixation
Source: eLife journal article supplement (doi:10.7554/elife.56384), 2020-12-04
Supplement: supp [file elife-56384-supp-v1.zip › elife_poa_e56384_Figure_2_figure_supplement_1_source_data_1.xlsx]

## Sheet: Sheet1
Supp.Figure 2-Source data. Data values and statistics underlying Supplementary Figure 2
Spine No.	Head volume (μm3)	Synapse Area(μm2)
1	0.102836	0.118217
2	0.0898976	0.0790817
3	0.0505973	0.0838585
4	0.0650593	0.125577
5	0.083767	0.108506
6	0.201101	0.163
7	0.0305909	0.0697
8	0.161513	0.147539
9	0.309782	0.451607
10	0.251132	0.42718
11	0.0557277	0.0548214
12	0.207366	0.1692
13	0.0950023	0.104607
14	0.0515799	0.135342
15	0.116212	0.106361
16	0.0622143	0.170257
17	0.0318919	0.0374119
18	0.0487883	0.0769914
19	0.0574228	0.06986
20	0.0818877	0.0860132
21	0.0456635	0.0490141
22	0.0815859	0.0879225
23	0.0504233	0.120569
24	0.0844786	0.133457
25	0.0694382	0.0997183
26	0.0734435	0.10685
27	0.107698	0.172394
28	0.0449298	0.0572545
29	0.073879	0.138632
30	0.0437253	0.0632592
31	0.0771498	0.197018
32	0.0474528	0.0622636
33	0.121946	0.170818
Summary
n=33
Statistic test	R2=0.7316
