# Supplementary material for: Ultrastructural comparison of dendritic spine morphology preserved with cryo and chemical fixation
Source: eLife journal article supplement (doi:10.7554/elife.56384), 2020-12-04
Supplement: supp [file elife-56384-supp-v1.zip › elife_poa_e56384_Figure_5_source_data_1.xlsx]

## Sheet: Sheet1
Figure 5-Source data. Data values and statistics underlying Figure 5
				Correlation between neck cross section area and resistance
Resistance (MΩ)				in cryo-fixed				in chemical-fixed
Spine No.	cryo-fixed	chemical-fixed		Spine No.	Neck cross section area (μm2)	Resistance (MΩ)		Spine No.	Neck cross section area (μm2)	Resistance (MΩ)
1	149.561	64.3954		1	0.0135446	149.561		1	0.0111695	64.3954
2	105.342	24.6214		2	0.00724115	105.342		2	0.0236077	24.6214
3	96.9637	101.346		3	0.00520235	96.9637		3	0.0139902	101.346
4	12.4117	3.48644		4	0.007767	12.4117		4	0.0341035	3.48644
5	11.4344	35.7477		5	0.0288278	11.4344		5	0.0223994	35.7477
6	3.59968	51.4285		6	0.0303278	3.59968		6	0.019971	51.4285
7	167.842	16.205		7	0.00914769	167.842		7	0.0278161	16.205
8	304.354	54.0602		8	0.00345189	304.354		8	0.0377462	54.0602
9	304.927	12.6974		9	0.00590315	304.927		9	0.0466754	12.6974
10	105.319	51.5356		10	0.00632366	105.319		10	0.0186387	51.5356
11	136.387	89.8132		11	0.00632882	136.387		11	0.0106323	89.8132
12	106.402	52.2353		12	0.00518659	106.402		12	0.00816483	52.2353
13	221.137	8.46095		13	0.0127476	221.137		13	0.0225402	8.46095
14	4.70525	70.2333		14	0.146355	4.70525		14	0.0181473	70.2333
15	38.1854	55.1033		15	0.0117562	38.1854		15	0.0136172	55.1033
16	94.1711	10.4119		16	0.00279415	94.1711		16	0.0355739	10.4119
17	13.7832	6.20135		17	0.0196509	13.7832		17	0.0386234	6.20135
18	28.0745	32.9081		18	0.0100168	28.0745		18	0.0256267	32.9081
19	186.215	64.9752		19	0.0098578	186.215		19	0.0105258	64.9752
20	270.339	35.8788		20	0.00294307	270.339		20	0.0158066	35.8788
21	18.6226	6.89012		21	0.00953455	18.6226		21	0.024857	6.89012
22	595.271	17.3935		22	0.00487278	595.271		22	0.0402583	17.3935
23	444.444	63.6324		23	0.00440444	444.444		23	0.0189183	63.6324
24	102.371	80.5199		24	0.0110967	102.371		24	0.0164462	80.5199
25	209.543	53.8484		25	0.00322192	209.543		25	0.0124461	53.8484
26	19.7825	4.20672		26	0.00776216	19.7825		26	0.0209225	4.20672
27	396.356	75.6913		27	0.00267294	396.356		27	0.0194468	75.6913
28	46.2776	10.6865		28	0.0170909	46.2776		28	0.0263066	10.6865
29	42.5166	2.67635		29	0.0210434	42.5166		29	0.0455402	2.67635
30	118.969	4.28364		30	0.00969734	118.969		30	0.0443148	4.28364
31	11.4642	13.9434		31	0.0481603	11.4642		31	0.0167432	13.9434
32	30.0973	63.268		32	0.0261503	30.0973		32	0.0310196	63.268
33	36.6888	19.1712		33	0.0313182	36.6888		33	0.0608733	19.1712
34	7.06778	30.1295		34	0.0271791	7.06778		34	0.0231698	30.1295
35	88.7479	31.7248		35	0.0138462	88.7479		35	0.0191143	31.7248
36	8.2948	145.539		36	0.0186331	8.2948		36	0.0120604	145.539
37	16.2208	29.2773		37	0.0206313	16.2208		37	0.0405639	29.2773
38	39.2051	34.0569		38	0.0318386	39.2051		38	0.0165733	34.0569
39	9.41787	206.192		39	0.0272306	9.41787		39	0.00586437	206.192
40	12.5559	124.144		40	0.0607999	12.5559		40	0.0152415	124.144
41	46.3517	17.3666		41	0.0197103	46.3517		41	0.0054637	17.3666
42	32.8363	27.1337		42	0.0457975	32.8363		42	0.0170229	27.1337
43	8.99277	12.7342		43	0.0126752	8.99277		43	0.0170143	12.7342
44	23.3327	122.962		44	0.0070765	23.3327		44	0.0112814	122.962
45	80.0051	114.394		45	0.00888796	80.0051		45	0.0242092	114.394
46	26.5673	4.74495		46	0.0385353	26.5673		46	0.0791748	4.74495
47	25.4171	24.1649		47	0.0264589	25.4171		47	0.0135701	24.1649
48	5.58019	11.1205		48	0.0172736	5.58019		48	0.0556609	11.1205
49	5.25329	50.4672		49	0.0136299	5.25329		49	0.0139311	50.4672
50	24.0934	30.3163		50	0.0425126	24.0934		50	0.0290528	30.3163
51	50.4172	89.8649		51	0.031615	50.4172		51	0.0144485	89.8649
52	93.8801	39.8566		52	0.0115912	93.8801		52	0.00965146	39.8566
53	33.5806	45.9958		53	0.0278051	33.5806		53	0.0244087	45.9958
54	30.0339	33.8815		54	0.00942509	30.0339		54	0.0194427	33.8815
55	77.304	26.5215		55	0.00775379	77.304		55	0.0339869	26.5215
56	85.7346	37.0335		56	0.00633386	85.7346		56	0.0266347	37.0335
57	51.1793	6.973		57	0.0145957	51.1793		57	0.0292877	6.973
58	22.4855	2.7856		58	0.026799	22.4855		58	0.155394	2.7856
59	57.17	34.4732		59	0.0179597	57.17		59	0.017395	34.4732
60	15.3769	7.38135		60	0.0286092	15.3769		60	0.0299322	7.38135
61	19.0785	42.7378		61	0.0276971	19.0785		61	0.0183106	42.7378
62	51.4788	31.0934		62	0.00806948	51.4788		62	0.025623	31.0934
63	174.54	13.7803		63	0.00337618	174.54		63	0.0453498	13.7803
64	299.62	29.5362		64	0.00417214	299.62		64	0.0344029	29.5362
65	302.67	25.0657		65	0.00276743	302.67		65	0.0311148	25.0657
66	406.241	3.91019		66	0.00496209	406.241		66	0.075425	3.91019
67	55.6785	32.2309		67	0.00852701	55.6785		67	0.079405	32.2309
68	3.90719	4.09717		68	0.0686931	3.90719		68	0.090041	4.09717
69	107.79	16.6255		69	0.00280618	107.79		69	0.0395094	16.6255
70	80.4685	3.86686		70	0.00873253	80.4685		70	0.0517531	3.86686
71	59.1844	35.7739		71	0.0118992	59.1844		71	0.0287542	35.7739
72	255.66	8.99754		72	0.00220034	255.66		72	0.0207208	8.99754
73	98.6527	73.6416		73	0.00463101	98.6527		73	0.0257259	73.6416
74	58.5524	38.2802		74	0.00975948	58.5524		74	0.0530957	38.2802
75	171.775	26.7613		75	0.0023183	171.775		75	0.0287598	26.7613
76	36.6864	114.949		76	0.0136997	36.6864		76	0.0125794	114.949
77	129.847	40.5076		77	0.00507024	129.847		77	0.0171538	40.5076
78	199.389	28.8727		78	0.0028862	199.389		78	0.027416	28.8727
79	268.664	10.9571		79	0.00389573	268.664		79	0.0202124	10.9571
80	114.796	54.1448		80	0.00681115	114.796		80	0.0188745	54.1448
81	210.646	33.2063		81	0.00381703	210.646		81	0.0255736	33.2063
82	86.3295	59.3314		82	0.00213624	86.3295		82	0.0112027	59.3314
83	233.701	52.9411		83	0.00364549	233.701		83	0.0110665	52.9411
84	471.946	69.5086		84	0.00411658	471.946		84	0.0275558	69.5086
85	194.847	48.8962		85	0.0077598	194.847		85	0.0167751	48.8962
86	111.738	52.4582		86	0.0165984	111.738		86	0.0262826	52.4582
87	218.473	46.3763		87	0.00445548	218.473		87	0.0317025	46.3763
88	58.7851	13.0079		88	0.00984828	58.7851		88	0.0348258	13.0079
89	164.236	157.777		89	0.0134475	164.236		89	0.0221911	157.777
90	333.997	24.6667		90	0.00378057	333.997		90	0.0323942	24.6667
91	64.7689	154.368		91	0.00443295	64.7689		91	0.0146564	154.368
92	304.798	6.22151		92	0.00371203	304.798		92	0.0314919	6.22151
93	122.035	68.2162		93	0.00592902	122.035		93	0.0142437	68.2162
94	3.77728	38.4283		94	0.00851625	3.77728		94	0.0167808	38.4283
95	2.2443	69.2776		95	0.075029	2.2443		95	0.0207826	69.2776
96	7.56022	79.7769		96	0.0381287	7.56022		96	0.0154388	79.7769
97	180.689	35.3767		97	0.0058265	180.689		97	0.022449	35.3767
98	8.54417	54.2131		98	0.0261911	8.54417		98	0.0235072	54.2131
99	19.162	12.7095		99	0.010963	19.162		99	0.0313238	12.7095
100	53.897	53.4076		100	0.0268729	53.897		100	0.0150644	53.4076
101	11.5819	121.067		101	0.0522186	11.5819		101	0.0151664	121.067
102	116.062	13.226		102	0.00606142	116.062		102	0.013586	13.226
103	215.517	8.32664		103	0.00188846	215.517		103	0.0278731	8.32664
104	92.1147	21.5737		104	0.00372289	92.1147		104	0.0232513	21.5737
105	145.519	26.2268		105	0.0109305	145.519		105	0.0142036	26.2268
106	35.3094	2.01043		106	0.00655239	35.3094		106	0.0584688	2.01043
107	42.4554	46.79		107	0.0172965	42.4554		107	0.0274722	46.79
108	85.5912	11.1543		108	0.00884656	85.5912		108	0.0623853	11.1543
109	139.269	19.1814		109	0.011049	139.269		109	0.0446927	19.1814
110	61.4235	93.7658		110	0.00647051	61.4235		110	0.0113544	93.7658
111	81.1118	55.0489		111	0.01914	81.1118		111	0.0178639	55.0489
112	105.049	120.255		112	0.0142049	105.049		112	0.00834019	120.255
113	145.338	33.7983		113	0.0115204	145.338		113	0.0365121	33.7983
114	117.333	79.5458		114	0.0136145	117.333		114	0.0113078	79.5458
115	123.154	50.8315		115	0.0175244	123.154		115	0.0172824	50.8315
116	46.8646	13.2366		116	0.0113117	46.8646		116	0.035836	13.2366
117		12.3789		Summary				117	0.0259123	12.3789
118		15.9829		N=	5			118	0.0309943	15.9829
119		34.2018		Statistic test	Spearman r, r=-0.7439 ,p<0.0001			119	0.0252	34.2018
120		8.4977						120	0.0449529	8.4977
121		28.3533						121	0.031892	28.3533
122		23.8405						122	0.0294634	23.8405
123		43.4674						123	0.0253249	43.4674
124		127.599						124	0.0163089	127.599
125		130.646						125	0.0148294	130.646
126		29.7602						126	0.0326182	29.7602
127		54.9832						127	0.0335986	54.9832
128		32.6092						128	0.0246103	32.6092
129		22.5541						129	0.0319592	22.5541
130		44.4255						130	0.0279736	44.4255
131		3.96849						131	0.0661917	3.96849
132		26.5126						132	0.0273127	26.5126
133		11.7924						133	0.0473657	11.7924
134		27.5733						134	0.0493252	27.5733
135		1.40514						135	0.119077	1.40514
136		29.9046						136	0.0155092	29.9046
137		67.6511						137	0.0226756	67.6511
138		8.02447						138	0.0274467	8.02447
139		77.9708						139	0.0209187	77.9708
140		120.816						140	0.0196294	120.816
141		125.642						141	0.0191995	125.642
142		49.4247						142	0.0289224	49.4247
143		45.2609						143	0.0140915	45.2609
144		85.4238						144	0.0212448	85.4238
145		11.2685						145	0.0370634	11.2685
146		52.4767						146	0.0349906	52.4767
147		18.4469						147	0.0152225	18.4469
148		24.2718						148	0.031545	24.2718
149		66.1037						149	0.0255894	66.1037
150		68.2761						150	0.0188338	68.2761
	Summary							Summary
Mean	109.7	44.08						N=	3
SD	113.4	37.7689						Statistic test	Spearman r, r=-0.6391 ,p<0.0001
Median	80.2	33.8
IQR	25.7, 148.6	13.9, 56.2
N=	5	3
Statistical test	t test, unpaired, Kolmogorov-Smirnov test, p<0.0001
