# Supplementary figures and images for: Ultrastructural comparison of dendritic spine morphology preserved with cryo and chemical fixation
Source: eLife journal article supplement (doi:10.7554/elife.56384), 2020-12-04

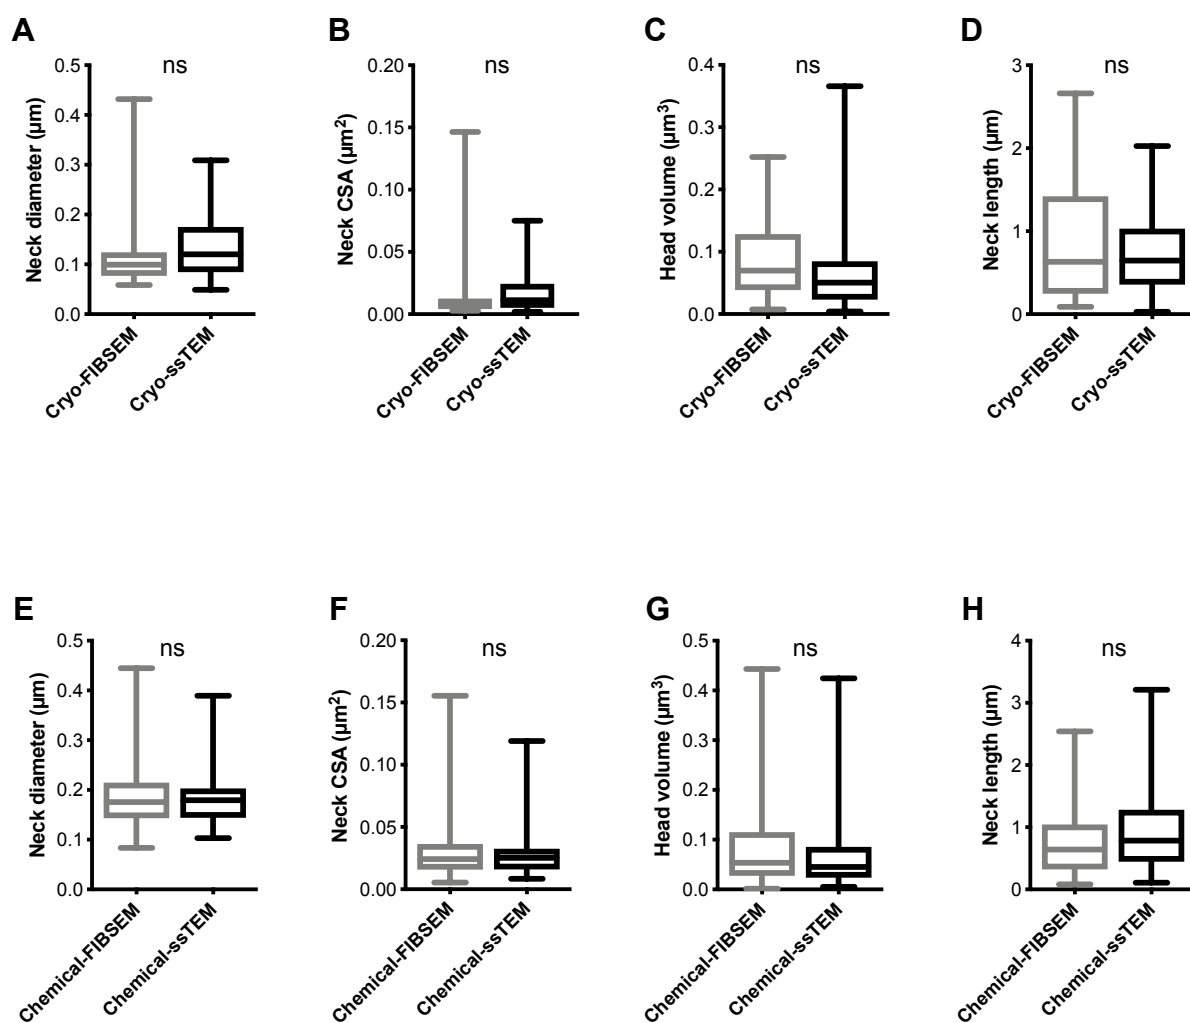

Figure 1 - supplement figure 1

Supplement: supp [file elife-56384-supp-v1.zip]

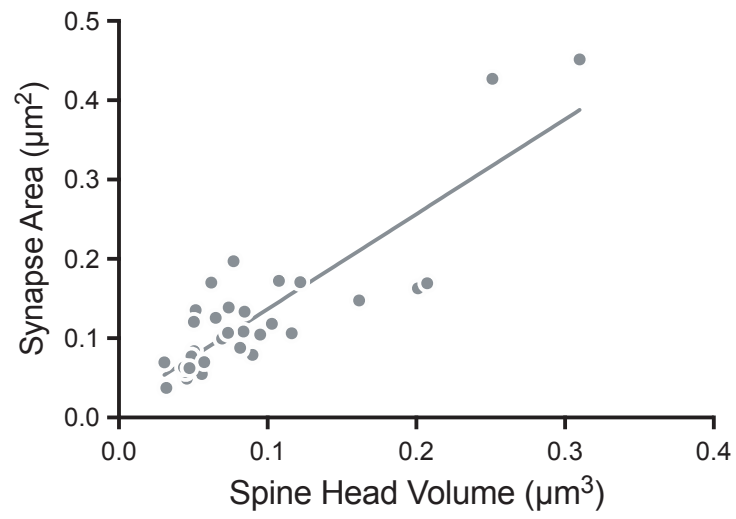

Figure 2 - supplement figure 1

Supplement: supp [file elife-56384-supp-v1.zip]
